## RESEARCH ARTICLE

### **Synchronized cardiac impulses emerge from multi-scale, heterogeneous local calcium signals within and among cells of heart pacemaker tissue**

Rostislav Bychkov, Magdalena Juhaszova, Kenta Tsutsui, Christopher Coletta, Michael D. Stern, Victor A. Maltsev, Edward G. Lakatta\*

Laboratory of Cardiovascular Science, Intramural Research Program, National Institute on Aging, NIH, Baltimore, MD 21224-6825, USA

#### **Running head:**

Heterogeneous calcium dynamics in heart pacemaker cells and tissue

#### **\*Contact information:**

Edward G. Lakatta, M.D.  
Laboratory of Cardiovascular Science, NIA/NIH  
Biomedical Research Center,  
251 Bayview Blvd., Baltimore, MD 21224, USA.  
Tel.: 410-558-8202; Fax: 410-558-8150  
E-mail : [LakattaE@mail.nih.gov](mailto:LakattaE@mail.nih.gov)

## ABSTRACT

The current functional paradigm of sinoatrial node (SAN), the heart's natural pacemaker, postulates the entrainment of full-scale action potentials (APs) at one common frequency and does not involve any subcellular events or subthreshold signals. SAN cells studied in isolation, however, generate subcellular, spontaneous, rhythmic, local  $\text{Ca}^{2+}$  releases (LCRs) and, while each LCR is a small, subthreshold signal, the emergent LCR ensemble signal critically contributes to generation of spontaneous APs and accounts for the heterogeneity of AP firing rates of these cells.

We hypothesized that cells embedded in SAN tissue also generate heterogeneous subthreshold LCR signals of different rates and amplitudes and that self-organization of the LCRs within and among cells critically contributes to the ignition of APs that emerge from the SAN to excite the heart. To this end we combined immunolabeling with a novel technique to image microscopic  $\text{Ca}^{2+}$  dynamics, including both LCRs and AP-induced  $\text{Ca}^{2+}$  transients (APCTs) within and among individual pacemaker cells across the entire mouse SAN.

Immunolabeling identified a meshwork of HCN4(+)/CX43(-) non-striated cells of different morphologies that extended along the crista terminalis from the superior vena cava to the inferior vena cava, becoming intertwined with a network of striated cells, rich in F-actin and CX43, but devoid of HCN4 immunolabeling. The earliest APCTs within a given pacemaker cycle occurred within a small area of HCN4 meshwork below the superior vena cava, just medial to the crista terminalis. Although subsequent APCT appearance throughout the SAN at low magnification resembled a continuous propagation pattern, higher magnification imaging revealed that APCT appearance at different sites within the SAN was patchy and discontinuous. Both LCR dynamics and APCTs were markedly heterogeneous

in amplitudes and frequencies among SAN cells: in some cells, APCT occurrence was preceded by diastolic LCRs occurring in the same cell; other cells did not generate spontaneous APCTs, but had subthreshold LCRs only, which preceded APCT generation by adjacent cells; APCTs of various frequencies were generated steadily or in bursts.

In summary, we discovered a novel, microscopic  $\text{Ca}^{2+}$  signalling paradigm of SAN operation that could not be detected with low-resolution, macroscopic tissue methods employed in prior studies: synchronized macroscopic signals within the SA node, including full-scale APs, emerge from heterogeneous microscopic subthreshold  $\text{Ca}^{2+}$  signals. This multiscale, complex process of impulse generation within the SAN resembles the emergence of organized signals from heterogeneous local signals generated within clusters of neurons within neuronal networks.

## **Introduction**

The sinoatrial node (SAN), the heart's primary pacemaker, exhibits a high degree of structural and functional complexity that is vital for generating flexible heart rates and robust rhythms [1]. Electrical impulses, i.e. action potentials (APs), are initiated within some SAN cells and occur within other SAN cells following variable delays, creating an impulse that exits the SAN to depolarize other parts of the heart to generate a heartbeat. Following the discovery of the SAN in 1906 by Keith and Flack [2] numerous SAN cell characteristics have been described including a diversity of: cell shapes and protein expression; arrangement of cells within SAN tissue (e.g. gradient vs. mosaic [3]); autonomic neuronal input [4]; cell to cell electrical and mechanical interactions [5]; and intranodal impulse initiation, spread within, and exit from, the SAN [6-9].

A generalized view of coordinated firing of pacemaker cells within the SAN emerged

about 40 years ago, in which a dominant or "master" pacemaker cell or a leading pacemaker center dictates the excitation rate and rhythm of thousands of other SAN pacemaker cells by overdriving their intrinsic spontaneous excitation rates [6, 10]. Shortly thereafter, however, an idea of mutual entrainment of coupled oscillators [11] was applied to the coordinated firing of the entire population of SAN cells [12, 13]: individual SAN cells that are loosely connected through low resistance junctions generate spontaneous excitations that differ in phase, mutually entrain each other to fire with a common period. The respective intrinsic cell oscillation frequencies of individual cells and the degree of intercellular electrical coupling determined the common period at which all cells fire. In other terms, the mutual entrainment theory of SAN [12] proposed that while the ensemble of SAN cells can be entrained to operate at a given frequency, there can be marked phase differences among spontaneous excitations of individual cells, and the frequency of impulses that exit the SAN lies somewhere between the fastest and slowest spontaneous intrinsic excitation rates of resident SAN cells.

This idea, that cells in SAN are in fact mutually entrained by phase resetting, rather than consecutively exciting each other as in ventricular muscle tissue, and that such cell-to-cell democratic interactions mimic "apparent" conduction [13, 14] was a major departure from the classic view of the SAN as a slowly conducting tissue in which the AP, initiated by a small cluster of dominant pacemaker cells, propagates radially at an accelerating pace. The idea of apparent conduction was supported by later studies that showed that the initiation of the cardiac impulse could be multimeric, i.e. initiated from different locations [15]. The early ideas of mutual entrainment were further elaborated in elegant studies by Verheijck et al. [16] with computer-controlled coupling conductance between individual pacemaker cells that found a critical coupling conductance for 1:1 frequency entrainment of less than

0.5 nS (i.e. generated by a few connexin molecules).

Similar to the evolution of ideas on how the SAN impulse is generated, the functional paradigm of pacemaker cells operating in isolation has also undergone substantial refinement from a simple to more complex origin: from what was described as the “pacemaker channel” that solely drives spontaneous diastolic depolarization [17], to a modern concept of a coupled-system of a chemical and ion current oscillators [18, 19]. According to this coupled oscillator theory, rhythmic local intracellular  $\text{Ca}^{2+}$  releases (LCRs) generated by an intracellular  $\text{Ca}^{2+}$  oscillator during diastole self-organize into a powerful and timely  $\text{Ca}^{2+}$  signal that drives the ensemble of membrane current oscillators to generate inward current culminating in membrane depolarization, sufficient to trigger an AP.

More specifically, the interactions of spontaneous LCRs with  $\text{Na}^+/\text{Ca}^{2+}$  exchanger (NCX) begin to occur near the maximum diastolic potential in the context of NCX current activation and anomalous rectification of HCN4 current both activated by hyperpolarization, and decay of  $\text{K}^+$  currents. These combined actions of LCRs, NCX, and HCN4 depolarize cell surface membrane to activate low-threshold  $\text{ICaL}$  (Cav1.3), or  $\text{ICaT}$  (Cav3.1) which, in turn, via  $\text{Ca}^{2+}$ -influx-induced  $\text{Ca}^{2+}$  release via ryanodine receptors, increases and feeds forward the ensemble LCR  $\text{Ca}^{2+}$  signal and NCX current to accelerate the diastolic depolarization [20]. The transition in LCR characteristics is steeply nonlinear, resembling a phase transition [21]. Thus, simultaneous growth of the diastolic ensemble LCR signal and diastolic surface membrane depolarization are thus manifestations of a slowly evolving self-organized electrochemical gradient oscillation that reaches criticality in late diastole, followed by a phase transition manifest as the rapid AP upstroke that triggers a whole cell cytosolic  $\text{Ca}^{2+}$  transient, i.e. AP-induced  $\text{Ca}^{2+}$  transient (APCT). In other terms, spontaneous LCR emergence at a critical time of an AP cycle (diastole) entrains a membrane depolarization,

thereby initiating an electrochemical gradient oscillation, which accelerates to achieve criticality in late diastole generating an AP. In this regard, late diastole might be considered to be an intrinsic entrainment zone [14] or time window in which chemical and current oscillators become mutually entrained, controlling the rate and rhythm of AP firing of that cell.

A wide spectrum of spontaneous AP firing cycle lengths observed among single SAN cells in isolation under a large variety of experimental conditions is, in fact, predicted by the spectrum and degree of synchronization of LCR periods among these cells [19, 22]. Here we hypothesized that on the larger scale of intact SAN tissue that LCRs not only occur within cells, but (i) differ in phase, frequency, and amplitude; and (ii) that heterogeneity of LCR characteristics among cells translates into different pattern of pacemaker cell excitation within the node.

## **Methods**

Our experiments conformed to the Guide for the Care and Use of Laboratory Animals, published by the US National Institutes of Health. The experimental protocols were approved by the Animal Care and Use Committee of the National Institutes of Health (protocol #034-LCS-2019). We used one-to-three month old C57BL mice (Charles River Laboratories, USA) anesthetized with sodium pentobarbital (50 mg/kg). The adequacy of anesthesia was monitored until reflexes to tail pinch were lost.

## **Sinoatrial Node Preparation**

The SA node was dissected according to standard methods [23]. The heart was removed quickly and placed in standard Tyrode solution containing (in mM): 130 NaCl, 24 NaHCO<sub>3</sub>, 1.2 NaH<sub>2</sub>PO<sub>4</sub>, 1.0 MgCl<sub>2</sub>, 1.8 CaCl<sub>2</sub>, 4.0 KCl, 5.6 glucose equilibrated with 95% O<sub>2</sub>

/ 5% CO<sub>2</sub> (pH 7.4 at 35.5°C). The whole heart was pinned to a silicon platform under a surgical microscope in order to excise the right and left atria. A 10-ml tissue bath was perfused with standard solution at a rate of 10 ml/min. After removal of the ventricles, the right atrium was opened to expose the crista terminalis, the inter-caval area, and the inter-atrial septum. The preparation was not trimmed, leaving SAN region together with surrounding atria and superior and inferior vena cava (SVC and IVC) intact. The SAN preparation was pinned to the silicon bottom of the experimental chamber by small stainless-steel pins with the endocardial side exposed. After mounting, the preparation was superfused with solution maintained at a temperature of 36±0.3°C. Anatomic landmarks were used to locate the SAN (Fig 1A).

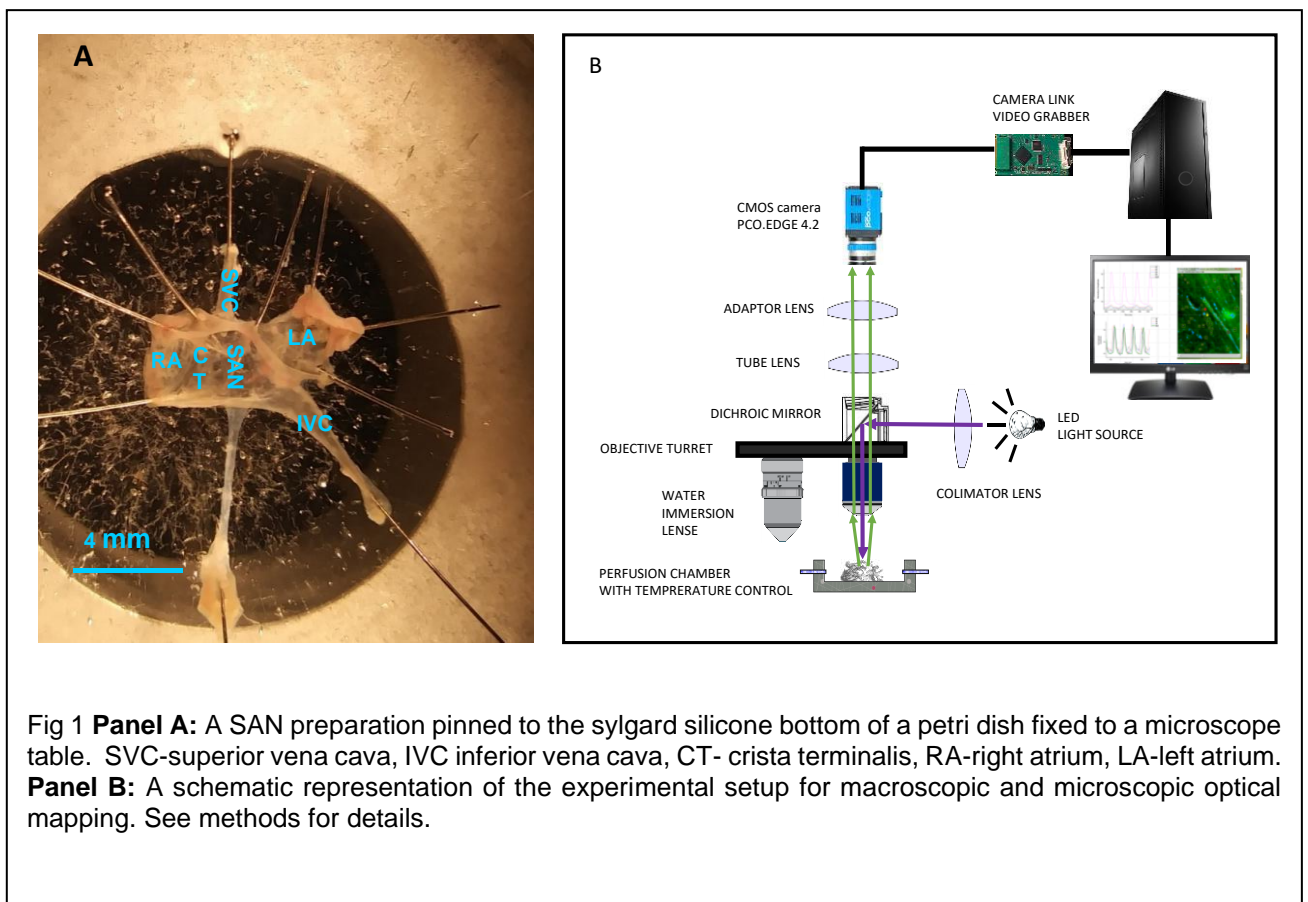

## **Optical system for SAN imaging**

We developed a novel imaging system to assess intracellular  $\text{Ca}^{2+}$  dynamics within individual cells resident within the entire mouse intact SAN. We used a stationary fixed stage upright microscope (AxioExaminer D1 equipped with zoom tube (0.5–4x), Carl Zeiss Microscopy LLC) and a camera (sCMOS PCO edge 4.2) with a high spatial and temporal resolution (Fig 1B). The microscope was mounted on a motorized X-Y MT-2078/MT-2278 translator (Sutter Instruments). The experimental chamber with the SAN preparation was placed on a platform (Sutter Instruments) that was mounted onto a pressurized air table (Newport).

## **Optical $\text{Ca}^{2+}$ mapping of SAN tissue**

The SAN preparation was incubated with a membrane-permeable  $\text{Ca}^{2+}$  indicator Fluo-4AM (10 $\mu\text{M}$ ) for 1.5 hours. The excitation light (CoolLED pE-300ultra) was directed to the microscope via a single port epifluorescence condenser, providing uniform illumination of the object plane. To optimize the signal to noise ratio and durability of the preparation, we applied excitation light to the SAN at 40% of the maximum power of the light source CoolLED. The excitation light was reflected to the SAN preparation by a dichroic mirror with a central wavelength of 498 nm, and the emitted fluorescence signal was collected through a 530 $\pm$ 20 nm filter (Semrock, USA). The fluorescence image of the SAN preparation was projected by air or water lenses onto the sCMOS camera sensor. To prevent interference of tissue motion during recordings from SAN tissue, we decoupled electrical excitation and mechanical contraction in some preparations by inhibiting the formation of the  $\text{Ca}^{2+}$ -sensitive regulatory complexes within sarcomeres using 10  $\mu\text{M}$  cytochalasin B [24]. Otherwise residual



mechanical artefacts produced during diastolic phase were compensated with ImageJ software during the post processing of recorded images (<https://imagej.nih.gov>).

We used 2.5x and 5x magnification to image APCTs across entire SAN preparations (n=7) from SVC to IVC. We used 10x and 20x magnification water-immersion lenses (W Plan-Apochromat 10x/0.5 M27 75mm, Plan-Apochromat 20x/1.0 DIC D=0.17 M27 75mm) to visualize Ca<sup>2+</sup> dynamics of individual cells within the SAN in a given Region of Interest (ROI). Ca<sup>2+</sup> signals had a high signal to noise ratio (>10) over the entire SAN from SVC to IVC, even at a low optical resolution with a 2.5x (air) lens. This signal consistency, together with high temporal (500-700 Hz) and spatial resolution of SAN images (2200x320 pixels of 2x4 mm tissue) allowed acquisition of data required to construct spatial and temporal maps of SAN cell network activation. The Ca<sup>2+</sup> indicator fluorescence signal intensity was stable for 20-35 minutes.

We used spontaneous APCTs to inform on the occurrence and locations of spontaneous APs within the SAN. To validate the occurrence of APCTs as reporters of APs, we simultaneously measured APs and APCTs in a subset (n=3) of SAN preparations. To record the transmembrane potential, we used sharp microelectrodes (40-70 MΩ) fabricated from aluminosilicate glass capillaries (1.5mm OD 0.86mm ID) with a horizontal pipette puller (Sutter Instruments, CA, USA), and back-filled with 3M KCl. The neck of the recording sharp microelectrode was pulled long enough to be sufficiently “springy” in order to follow tissue movement without compromising the recording. A sharp glass microelectrode was inserted from the endocardial side of the tissue. APs were recorded with a high impedance amplifier (A-M Systems, USA) with a virtual bridge circuit for current injection. The electrical signal was digitized with Digidata 1440 and analyzed with PCLAMP10 software (both from Molecular Dynamics, USA).

## Whole mount SAN Immunolabeling

We combined  $\text{Ca}^{2+}$  imaging with immunolabeling to correlate  $\text{Ca}^{2+}$  dynamics with cytoarchitecture. Another subset ( $n=7$ ) of SAN preparations was fixed in 4% paraformaldehyde overnight at  $4^{\circ}\text{C}$ . The SANs were washed three times in phosphate-buffered saline (PBS) and permeabilized overnight in PBS containing 0.2% Triton X-100 and 20% DMSO. After blocking the non-specific binding sites by incubation for 8 hours with 0.2% Tween-20 in PBS containing 3% normal donkey serum, SAN whole-mount preparations were incubated for 3 days with the primary antibodies diluted in PBS containing 0.2% Tween-20 and 3% normal donkey serum. They were then washed three times with PBS containing 0.2% Tween-20, incubated overnight with appropriate secondary antibodies then washed three times with PBS containing 0.2% Tween-20. Whole-mount SAN preparations were mounted in Vectashield (Vector Laboratories) and sealed with a coverslip. The SAN preparations were mounted with the endocardium uppermost. Immunolabeling of whole-mount SANs was imaged with a ZEISS-LSM510 confocal microscope and a ZEISS-AxioExaminer D1 fluorescence microscope with zoom tube (0.5–4x) equipped with appropriate filters for fluorescence spectra. Parts of the whole-mount SAN were imaged individually, and these images were concatenated into one output image to portray entire SAN preparation. To obtain high resolution images of the entire SAN, the preparations were imaged in a tile scanning mode. Fluorescence of immunolabelled cells within SAN tissue in 3D was visualized by confocal optical slicing (Z stacking) to a depth up to  $100\ \mu\text{M}$  from the endothelial surface.

Antibodies: HCN4 positive cells were identified by rabbit polyclonal antibodies for hyperpolarization-activated, cyclic nucleotide-gate cation channels HCN4 (1:250; Alomone

Labs). Mouse monoclonal antibody to connexin 43 (1:250; Invitrogen) was used to label the gap junctions of striated cells and Alexa Fluor 633 phalloidin was used to visualize the F-actin filaments.

### **Immunolabeling of whole mount SAN for HCN4, connexin 43 and F-actin.**

Previous studies in thin slices from central SAN demonstrated that numerous cells have strong HCN4 immunolabeling and lacked CX43 [25]. To explore the expression patterns of key molecules/markers of pacemaker cells, we immunolabeled and reconstructed nearly the entire cellular network within intact whole mount SAN preparations. We analyzed immunolabeling of the entire SAN at low optical magnification and analyzed immunolabeling within regions in which leading cells with rhythmical LCRs preceded APCTs at higher magnification. We employed confocal imaging to acquire a 3D reconstruction of the optically dissected intact SAN tissue (of note, in previous studies 3D reconstruction was performed by physical dissection of SAN tissue with a microtome into separate tissue slices). The resultant 3D-networks of intact cells expressing HCN4, F-actin and/or CX43 were reconstructed and further examined with Zeiss imaging software ZEN2. Images were processed with Image J software (<https://imagej.nih.gov> open-source, NIH)

## **Results**

### **Simultaneous action potentials recording and intracellular Ca<sup>2+</sup> imaging**

We imaged spontaneous APCTs to report the occurrence of spontaneous APs. In order to ensure the fidelity between the occurrence of APCTs and the occurrence of APs, we simultaneously acquired Ca<sup>2+</sup> signal fluorescence, recorded at lower optical power, and APs, recorded with conventional sharp microelectrodes in a subset of experiments (Fig 2).

In each experiment, a ROI within a  $\text{Ca}^{2+}$  image at low magnification was selected around the tip of the sharp microelectrode. Figure 2A shows a representative example of simultaneously recorded AP-s and APCTs. The AP trace and  $\text{Ca}^{2+}$  transient recordings, normalized to their peak amplitudes, are superimposed in Figure 2B. Note that, as expected, an APCT shortly followed the corresponding AP onset. APCT cycle lengths plotted against AP cycle lengths showed a tight linear relationship (Fig 2C), validating the use of whole mount APCT images to report the occurrence of APs within SAN tissue.

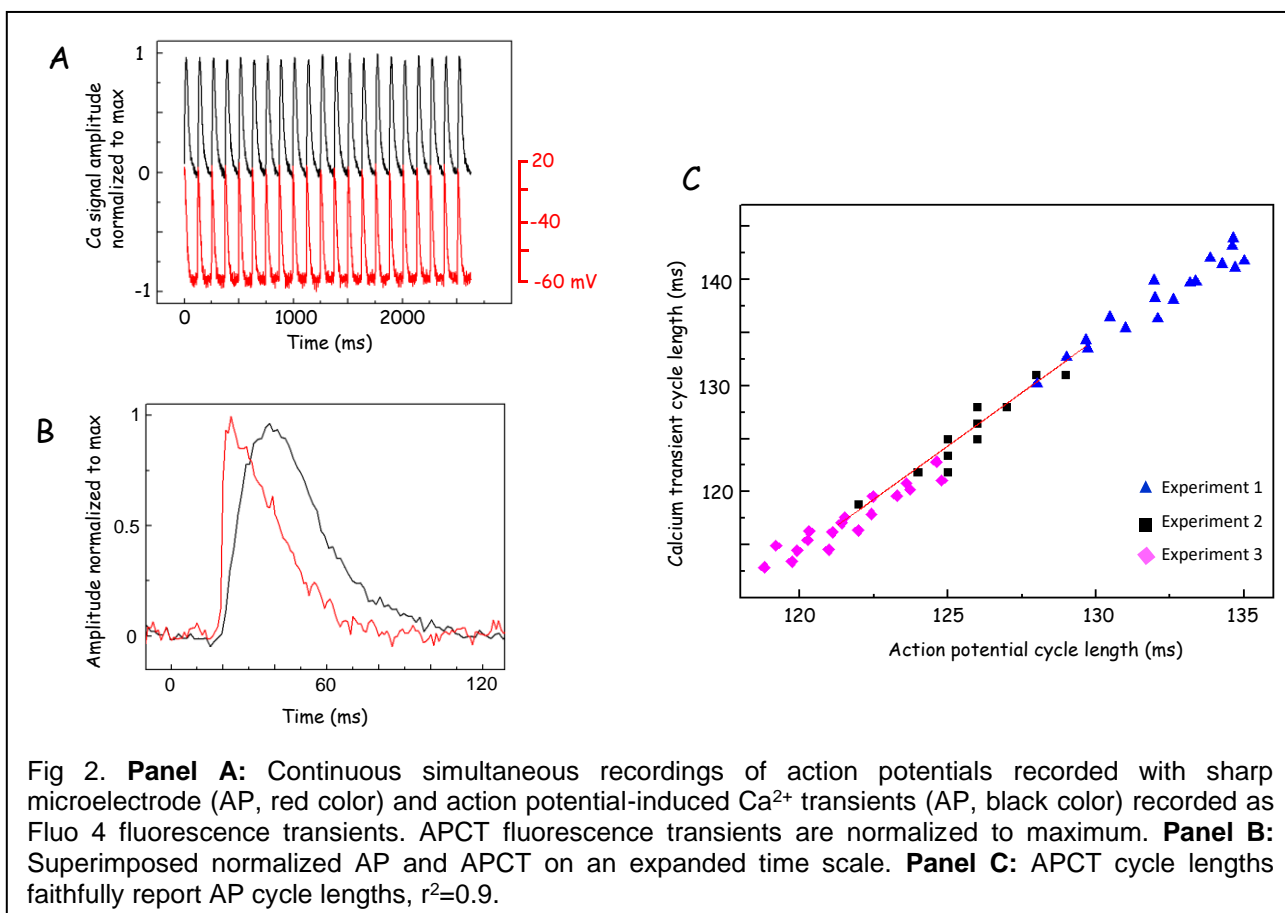

## **Ca<sup>2+</sup> imaging at low magnification within ROIs from SVC to IVC**

The mouse SAN averages 100-200  $\mu\text{m}$  in thickness and up to 1000  $\mu\text{m}$  in width and 4000  $\mu\text{m}$  in length, enabling visualization of the entire SAN preparation within a microscopic field of view at low optical magnification. We quantified Ca<sup>2+</sup> signals in defined ROIs within a 2D SAN image. Phase shift analyses of APCTs recorded within different ROIs permitted assessment of phase heterogeneity among cells in which the first and subsequent APCTs were generated within the microscopic field (Fig 3). Ca<sup>2+</sup> signal fluorescence intensity in each ROI was normalized to the APCT maximum peak amplitude (1) over baseline fluorescence (0). The earliest detectable APCTs emerged within an area close to SVC (red circle Fig 3A). APCTs that were out of phase (by  $9.7 \pm 2.3$  ms, n=9) with the earliest APCTs were recorded along the crista terminalis (red, blue and orange circles) close to the point at which APCT's occurred in the right atrium. APCTs occurrence near the septum (red, violet and light blue circles in Fig 3) appeared with a phase shift of  $16.1 \pm 2.7$  ms (n=9) from the initiation area. Although the result of these phase shift analyses are consistent with an apparent propagation pattern reported previously employing isochrones superimposed onto XY SAN coordinates [7-9], such phase shifts are also consistent with partial spatiotemporal synchronization of weakly coupled oscillators operating out of phase of each other [12-14]. In order to discriminate between the two interpretations, we recorded panoramic images across the entire SAN within a given focal plane.

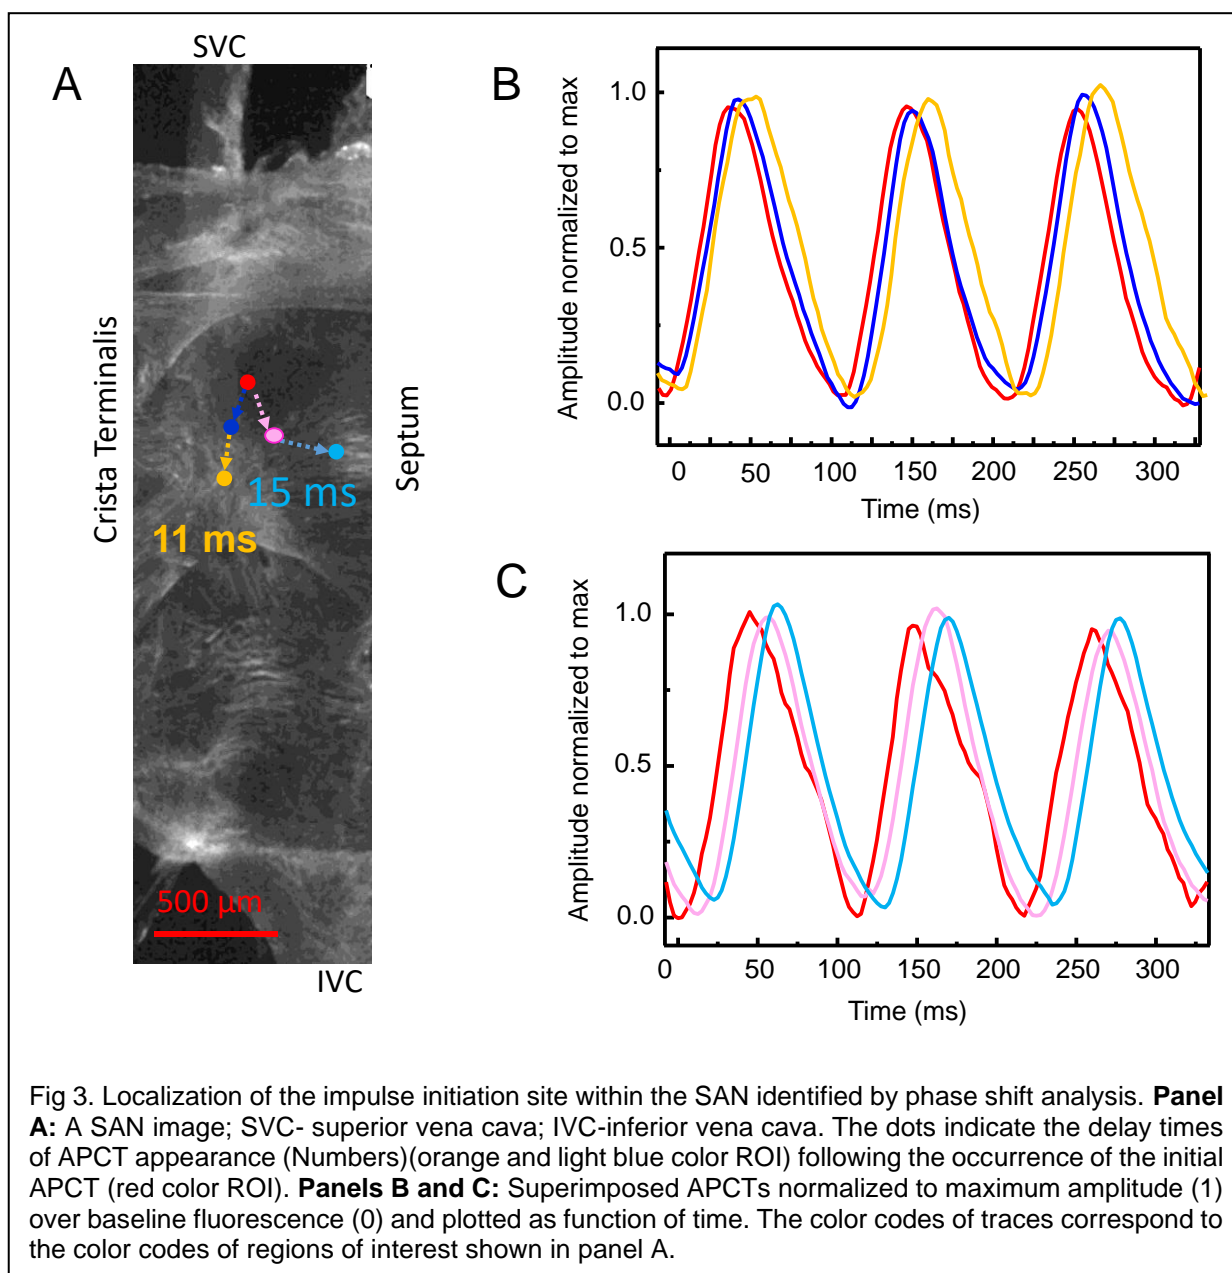

### Panoramic Imaging (at 2.5x) of the entire SAN

Figure 4 illustrates a complete spatiotemporal pattern (red color in Fig 4) and delay times following the initial APCT, of subsequent APCT occurrences across the entire SAN within a given focal plane (Movie 1). Two ROIs in panel A that are separated by approximately 300  $\mu$ m, show the location in which initial APCTs emerge (black ROI), i.e. the initiation site, and the region where the next APCTs emerged (blue ROI). When the APCTs

from the two ROIs (in panel A) were normalized to their maxima, superimposed, and plotted as function of time, their phase difference was 7 ms (Fig 4 B). The initial APCTs occurred at ~2 ms within a region of about 20 by 200  $\mu\text{m}$  near the SVC (red color Fig 4C) that corresponds to the black ROI in panel A. Other APCTs occurred at different sites after variable delays (4-18 ms following the initial APCTs, red color in a sequence of subpanels in Fig 4C).

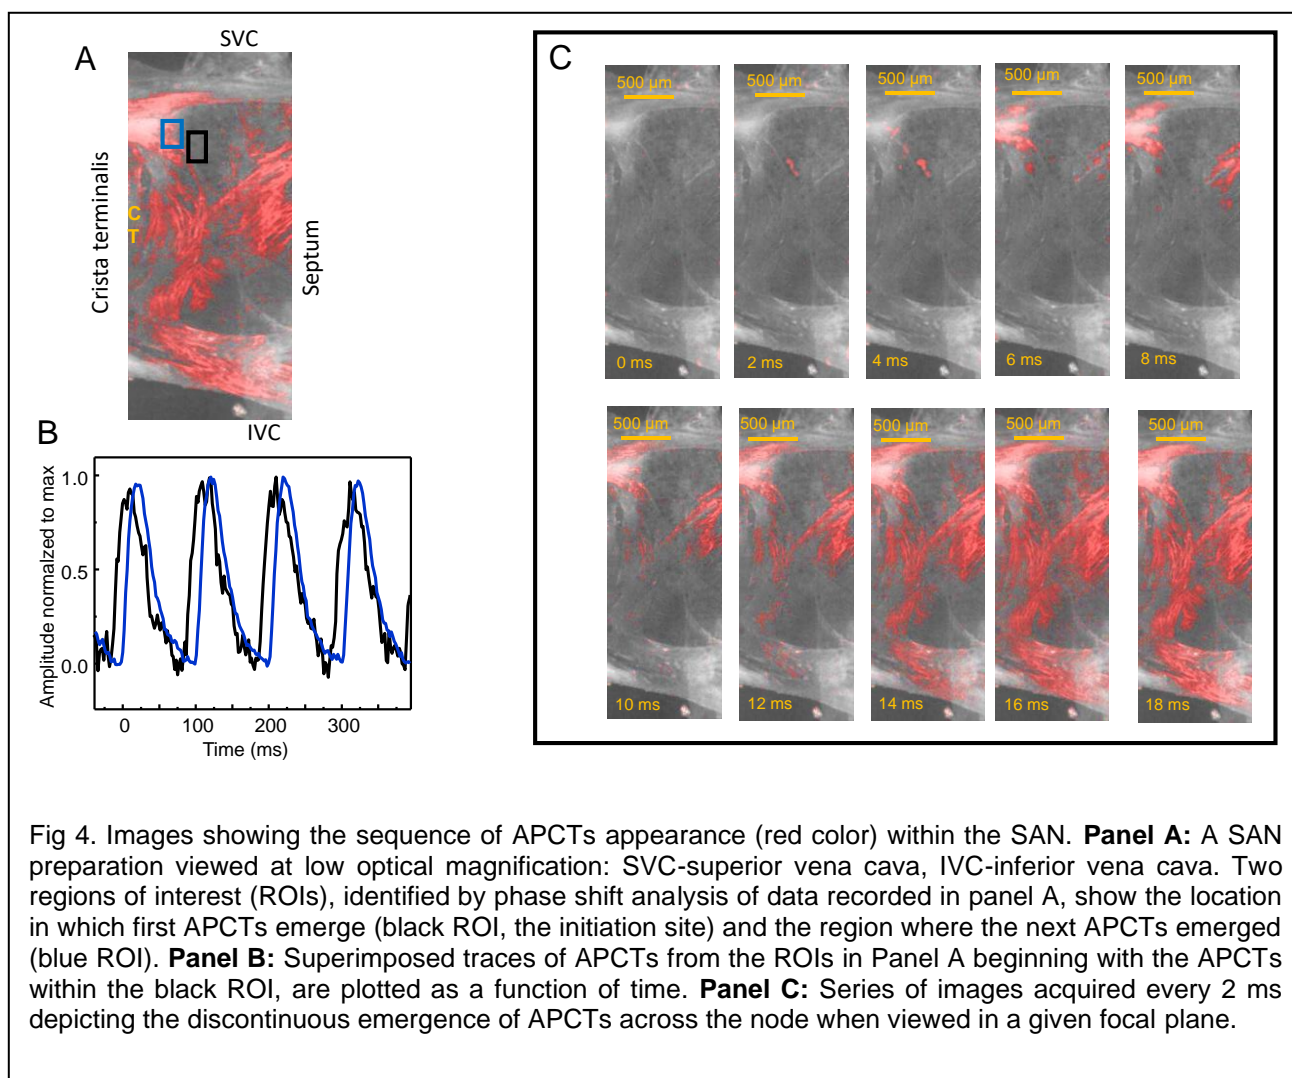

Fig 4. Images showing the sequence of APCTs appearance (red color) within the SAN. **Panel A:** A SAN preparation viewed at low optical magnification: SVC-superior vena cava, IVC-inferior vena cava. Two regions of interest (ROIs), identified by phase shift analysis of data recorded in panel A, show the location in which first APCTs emerge (black ROI, the initiation site) and the region where the next APCTs emerged (blue ROI). **Panel B:** Superimposed traces of APCTs from the ROIs in Panel A beginning with the APCTs within the black ROI, are plotted as a function of time. **Panel C:** Series of images acquired every 2 ms depicting the discontinuous emergence of APCTs across the node when viewed in a given focal plane.



Color-coded maps that to assign different colors to isochrones recorded at low optical power (Fig 5A) are another method to represent phase heterogeneity of APCTs among local regions across the entire SAN relative to the time at which the first APCTs appeared. Color spectra varying from yellow to violet in Figure 5A correspond to the range of delay times at which the APCTs were first detected in a given tissue location (i.e. each pixel of videoframe). The map reveals delays in the range from 0 ms to 40 ms and demonstrates discontinuity of APCT occurrence within the panoramic image (2.5x objective) of the entire SAN. Data in Figs 4 and 5A are consistent with the idea of weakly entrained oscillators operating out of phase [12, 13]; but are in antithesis to a concentric continuous spread observed with low resolution techniques in previous studies [7-9] that had been interpreted as conduction propagation.

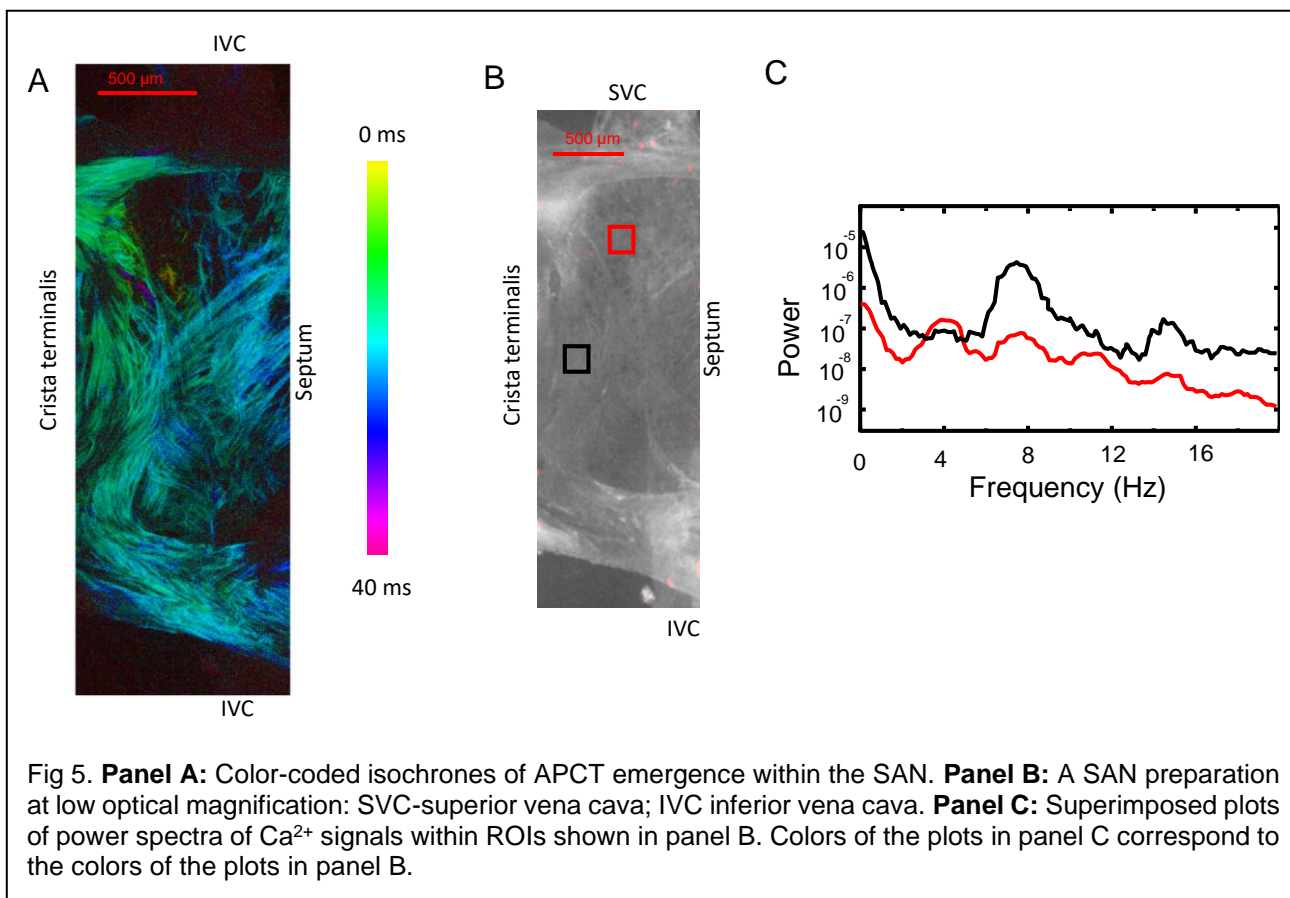



We applied Fast Fourier transform to detect frequency heterogeneity of low amplitude  $\text{Ca}^{2+}$  signals in the area near to where initial APCT's were detected (ROIs in Fig 5B). While the power spectrum of the signal in Fig 5C within the red ROI in panel B revealed dominant peaks at both 4 Hz and 7.3 Hz, the power spectrum of the signal within black ROI, close to crista terminalis in panel B revealed a dominant peak at 7.3 Hz, but not a peak at 4 Hz, indicating heterogeneous range of frequencies of local  $\text{Ca}^{2+}$  signals within the two ROIs.

### **Heterogeneous LCR-APCT patterns among clusters of SAN cells localized within the central SAN**

The location at which initial APCTs occurred in the previous figures is the thinnest region of the SA node. We further inspected this APCT initiation region (blue rectangle in Fig 6A, which (near to the black ROI in Fig 4) at a higher optical resolution using 10x and 20x water-immersion lenses. We discovered  $\text{Ca}^{2+}$  signals that were markedly heterogeneous within and among cells and ranged from highly synchronized to less synchronized APCTs, to lower amplitude APCTs. APCTs were manifest as synchronous increases in intracellular  $\text{Ca}^{2+}$  throughout the entire volume of a cell (Fig 6B yellow rectangles). In contrast, LCRs were manifest as an increase in  $\text{Ca}^{2+}$  in one part of the cell, while at the same time,  $\text{Ca}^{2+}$  in other parts of the same cell remained at its basal level (Fig 6B red rectangle) (Movie 2). Importantly many cells manifested only low amplitude LCRs in the absence of APCTs. Also, of note, the earliest  $\text{Ca}^{2+}$  signal within the ROI did not originate from the same cell in every cycle.

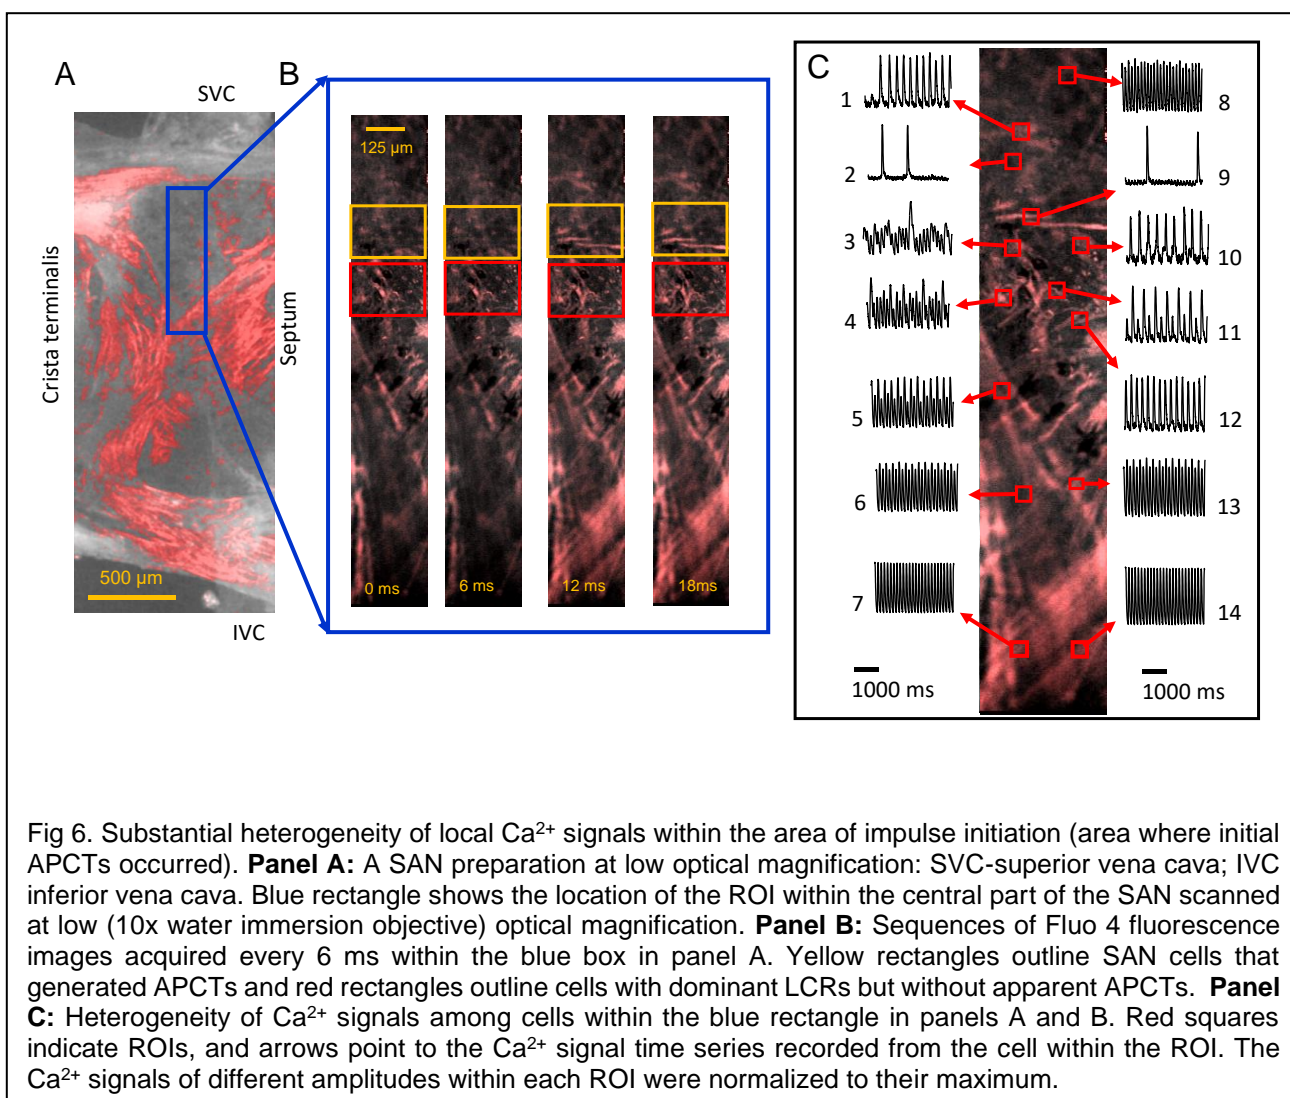

Fig 6. Substantial heterogeneity of local Ca<sup>2+</sup> signals within the area of impulse initiation (area where initial APCTs occurred). **Panel A:** A SAN preparation at low optical magnification: SVC-superior vena cava; IVC inferior vena cava. Blue rectangle shows the location of the ROI within the central part of the SAN scanned at low (10x water immersion objective) optical magnification. **Panel B:** Sequences of Fluo 4 fluorescence images acquired every 6 ms within the blue box in panel A. Yellow rectangles outline SAN cells that generated APCTs and red rectangles outline cells with dominant LCRs but without apparent APCTs. **Panel C:** Heterogeneity of Ca<sup>2+</sup> signals among cells within the blue rectangle in panels A and B. Red squares indicate ROIs, and arrows point to the Ca<sup>2+</sup> signal time series recorded from the cell within the ROI. The Ca<sup>2+</sup> signals of different amplitudes within each ROI were normalized to their maximum.

Figure 6, Panel C contrasts the large variety of Ca<sup>2+</sup> signals generated in cells within the blue rectangle in panel A. SAN cells in ROIs 1, 2, 8, 9, 10, 11 and 12 in panel C generated **both** APCTs and LCRs; cells in ROIs 6, 7, 13, 14 generated **only** APCTs, but **not** LCRs; while cells in the ROIs 3 and 4 persistently produced LCRs, but **not** APCT's.

Furthermore, spontaneous intrinsic frequencies and amplitudes of Ca<sup>2+</sup> signals within different ROIs were markedly heterogeneous:

- Cells within ROIs 7,8 and 14 generated only APCTs of relatively constant amplitude at a frequency of 8.1Hz, which was also the frequency of AP's recorded in the right atrium.
- Cells within ROIs 5, 6 and 13 generated APCTs at frequencies that were also close to those in ROIs 7,8 and 14, but exhibited APCT amplitude alternans.
- Cells in ROIs 2, 9 and 10 generated APCTs at low frequencies of 0.6Hz, 0.6Hz and 2.8Hz), much lower than that in ROI's 6, 13, 7, 8, 14
- Cells within ROI 11 generated APCTs at a low frequency of 4.7Hz that alternated in amplitude.
- And importantly, the cell in ROI 1 that was initially silent began to generate spontaneous APCTs at a frequency 3.7Hz during the course of sequential image recording. Thus, cells can generate APCTs both steadily and in bursts.

### ***LCRs precede APCTs in some cells within the central SAN***

To uncover patterns of the relationships between LCRs and APCTs in cells, we focused on diastolic phases of APCT cycles. In some cells we observed a temporal relationship between LCRs and APCTs that is characteristic of single SAN cells in isolation [26], i.e. diastolic LCRs in a given cell occurred prior to the APCT firing in that cell. A typical example is shown in Fig 7 and Movie 3. LCRs and APCTs measured in the green rectangle (Panel A) are observed as small bright spots occurring during the diastolic phase (yellow arrows in Fig 7B). Line scan images provide a convenient, instant view of  $Ca^{2+}$  dynamics (i.e.  $Ca^{2+}$  signal vs. time) localized along a selected line within the movie, i.e. in the corresponding sequence of TIF files. The sequence of line-scans (Fig 7C) clearly illustrates LCRs occurrence prior to APCTs in the same cell during several cycles. Overlaid plots of LCRs

and APCTs show that LCRs onset occurs during an intrinsic, diastolic “entrainment zone” [14] prior to the onset of APCTs within each cycle (Fig 7D and E).

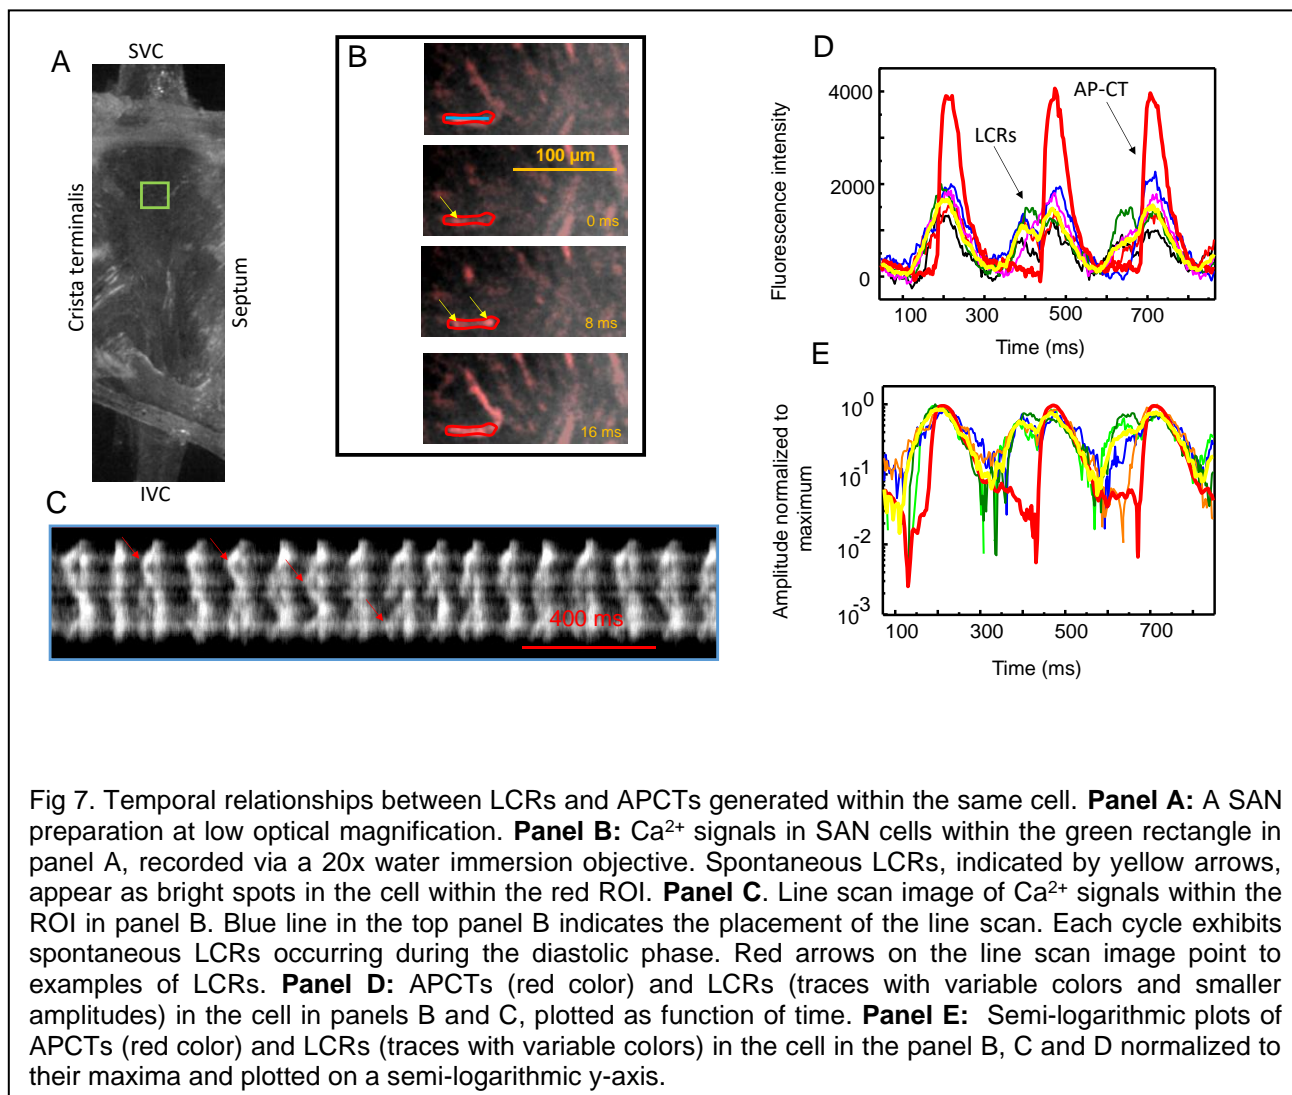

### Some SAN cells generate only LCRs that precede APCTs in adjacent cells

We observed a novel type of LCR-APCT relationship in which some cells within a cell cluster (Fig 8A green ROI) did not generate APCTs, but generated only LCRs (Fig 8B, yellow ROI) that preceded APCT firing in one or several adjacent cells that did not manifest their own LCRs (Fig 8B red ROI, Movie 4). Note that the cell with only LCRs was the leading cell within the cluster, because LCRs gave rise to the earliest  $\text{Ca}^{2+}$  signal that was detected within

the cluster. In this cell, having LCRs only, the LCRs emerged during the diastolic period that preceded AP firing of the **adjacent** SAN cells (red ROI Fig 8B). Note also that the cells adjacent to those cells generating only APCTs did not manifest intrinsic LCRs prior to generating a synchronous APCT (Movie 4). A sequence of line-scans recorded from the leading cell firing only LCRs and from an adjacent cell that fired APCTs but without LCRs (Fig 8C) confirmed that LCRs in the cell without APCT's (image within lower yellow frame Fig 8C) occurred prior to APCTs in the adjacent cell (image within top red frame Fig 8C). Superimposed plots of the amplitude of LCRs from the leading cell with LCRs only, and APCTs from an adjacent cell (Fig 8D) also showed that LCRs onset in the leading cell occurred during diastolic phase of adjacent cells. Note that the amplitude of the ensemble LCR  $Ca^{2+}$  signal in the leading cell without APCTs continued to organize until the APCT in the adjacent cell reached its peak amplitude, after which the LCR ensemble  $Ca^{2+}$  signal decayed to basal level, indicating that the LCRs  $Ca^{2+}$  dynamics in the leading cell, in this case, are not externally reset by AP occurrence in the adjacent neighboring cells. This temporal relationship was observed during all recorded cycles in this preparation: Amplitudes of the LCRs and APCTs normalized to their maxima and plotted in logarithmic scale revealed that LCRs and APCTs reached their maxima simultaneously, i.e. LCRs in the leading cell continue to become synchronized in time and to the time at which the peak amplitude of the APCT is achieved in the adjacent cell without LCR's (Fig 8E). We observed similar behavior in 7 of 7 SAN preparations.

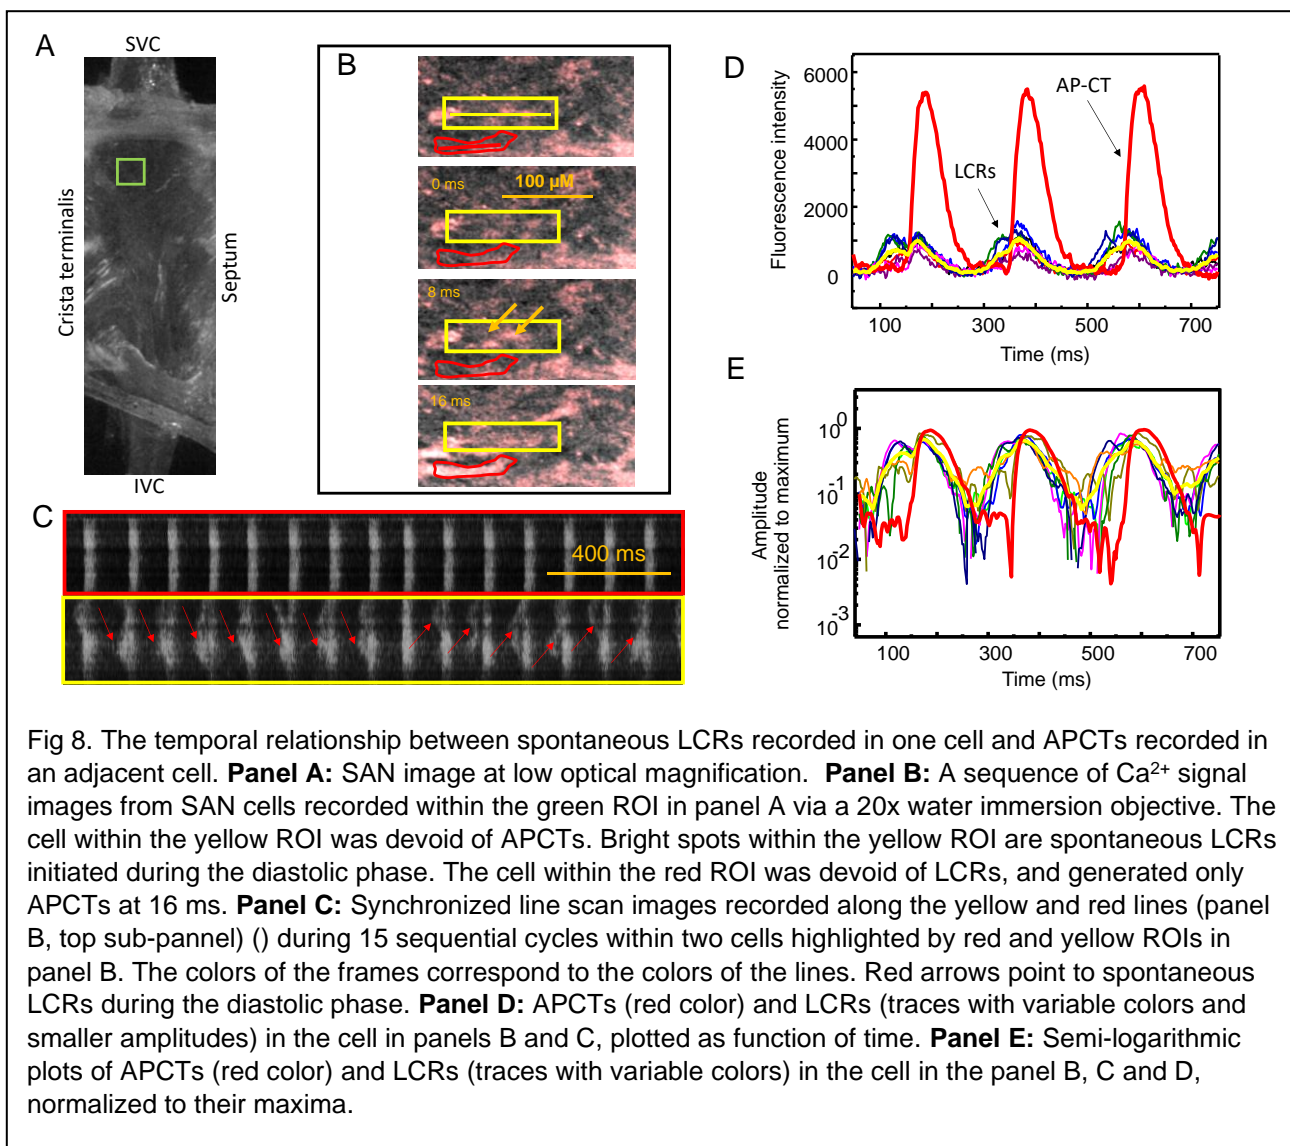

## Variable cycle-to-cycle temporal relationships of $\text{Ca}^{2+}$ signals occurring within some SAN cells

We observed yet another type of heterogeneity of LCRs and APCTs within and among cells within the central SAN: LCRs generated in cells within the green rectangle in panel A occurred in the leading cell that did not fire APCTs (Fig 9B, yellow ROI, Movie 5) preceded APCTs in an adjacent cell that generated both APCTs and LCRs.



LCRs (red dots) in the leading cell within the yellow ROI were initiated during the diastolic phase of the adjacent cell (within the red ROI). Line-scan images (Fig 9C) taken from the leading cell (Fig 9B yellow ROI) and from an adjacent cell (Fig 9B red ROI) confirmed that LCRs in the leading cell (yellow ROI) occurred prior to APCTs in the adjacent cell (red ROI). LCRs in the leading cell indicated by red arrows in the line scans within yellow rectangle in Panel 9C occurred during every diastolic phase. Superimposed plots of the amplitude of LCRs from the leading cell with LCRs only (yellow line), and APCTs from the adjacent cell having both LCR's and APCTs (red line) also showed that the onset of LCRs in the leading cell having only LCRs occurred during the diastolic phase “entrainment zones” of the adjacent cell firing both APCTs and LCRs (Fig 9D).

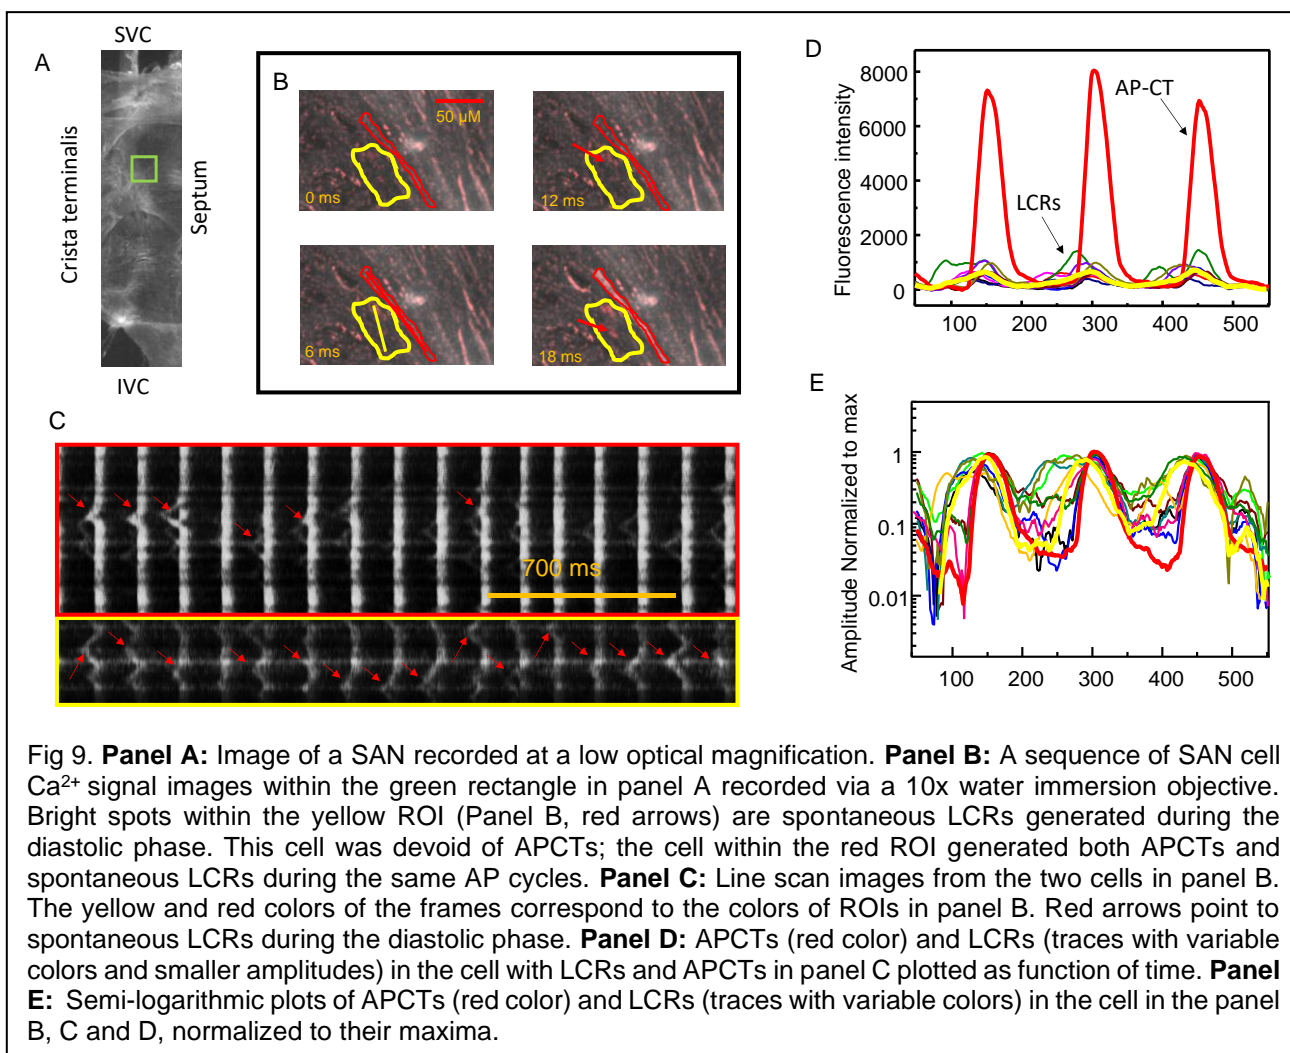

Normalized plots of the LCRs and APCTs in the cell with both LCRs and APCTs (Fig 9) revealed that LCRs and APCTs reached their maxima simultaneously, i.e. LCRs continue to become more synchronized (ensemble LCR signal continues to grow) up to the time of the peak amplitude of the APCT (Fig 9E). The phase behavior of the relationship between LCRs and peak APCT in cells with both LCRs and APCTs (in Fig 9) and cells having only LCRs (Fig 9) is similar to that observed between cells having LCRs only and in adjacent cells that fired APCTs but had no LCRs (Fig 8).

### **HCN4 immunolabeling**

A panoramic image of a whole mount SAN preparation from superior to inferior vena cava obtained with a 2.5x objective (Fig 10) revealed the entire HCN4 expression pattern (red color) within the intact SAN, extending along the crista terminalis within the central SAN from the SVC and the septum toward the aperture of the inferior vena cava. HCN4 immunoreactivity was much stronger within the SAN than in the right atrium (to the left of the crista terminalis), in line with previous reports [27]. HCN4 immunolabeling covered more than 80% of the surface of the central SAN between superior and inferior vena cava (Fig 10). Some HCN4-positive cell clusters extended medially towards the septum and HCN4-positive cells were also observed close to IVC, but none were detected within the crista terminalis.



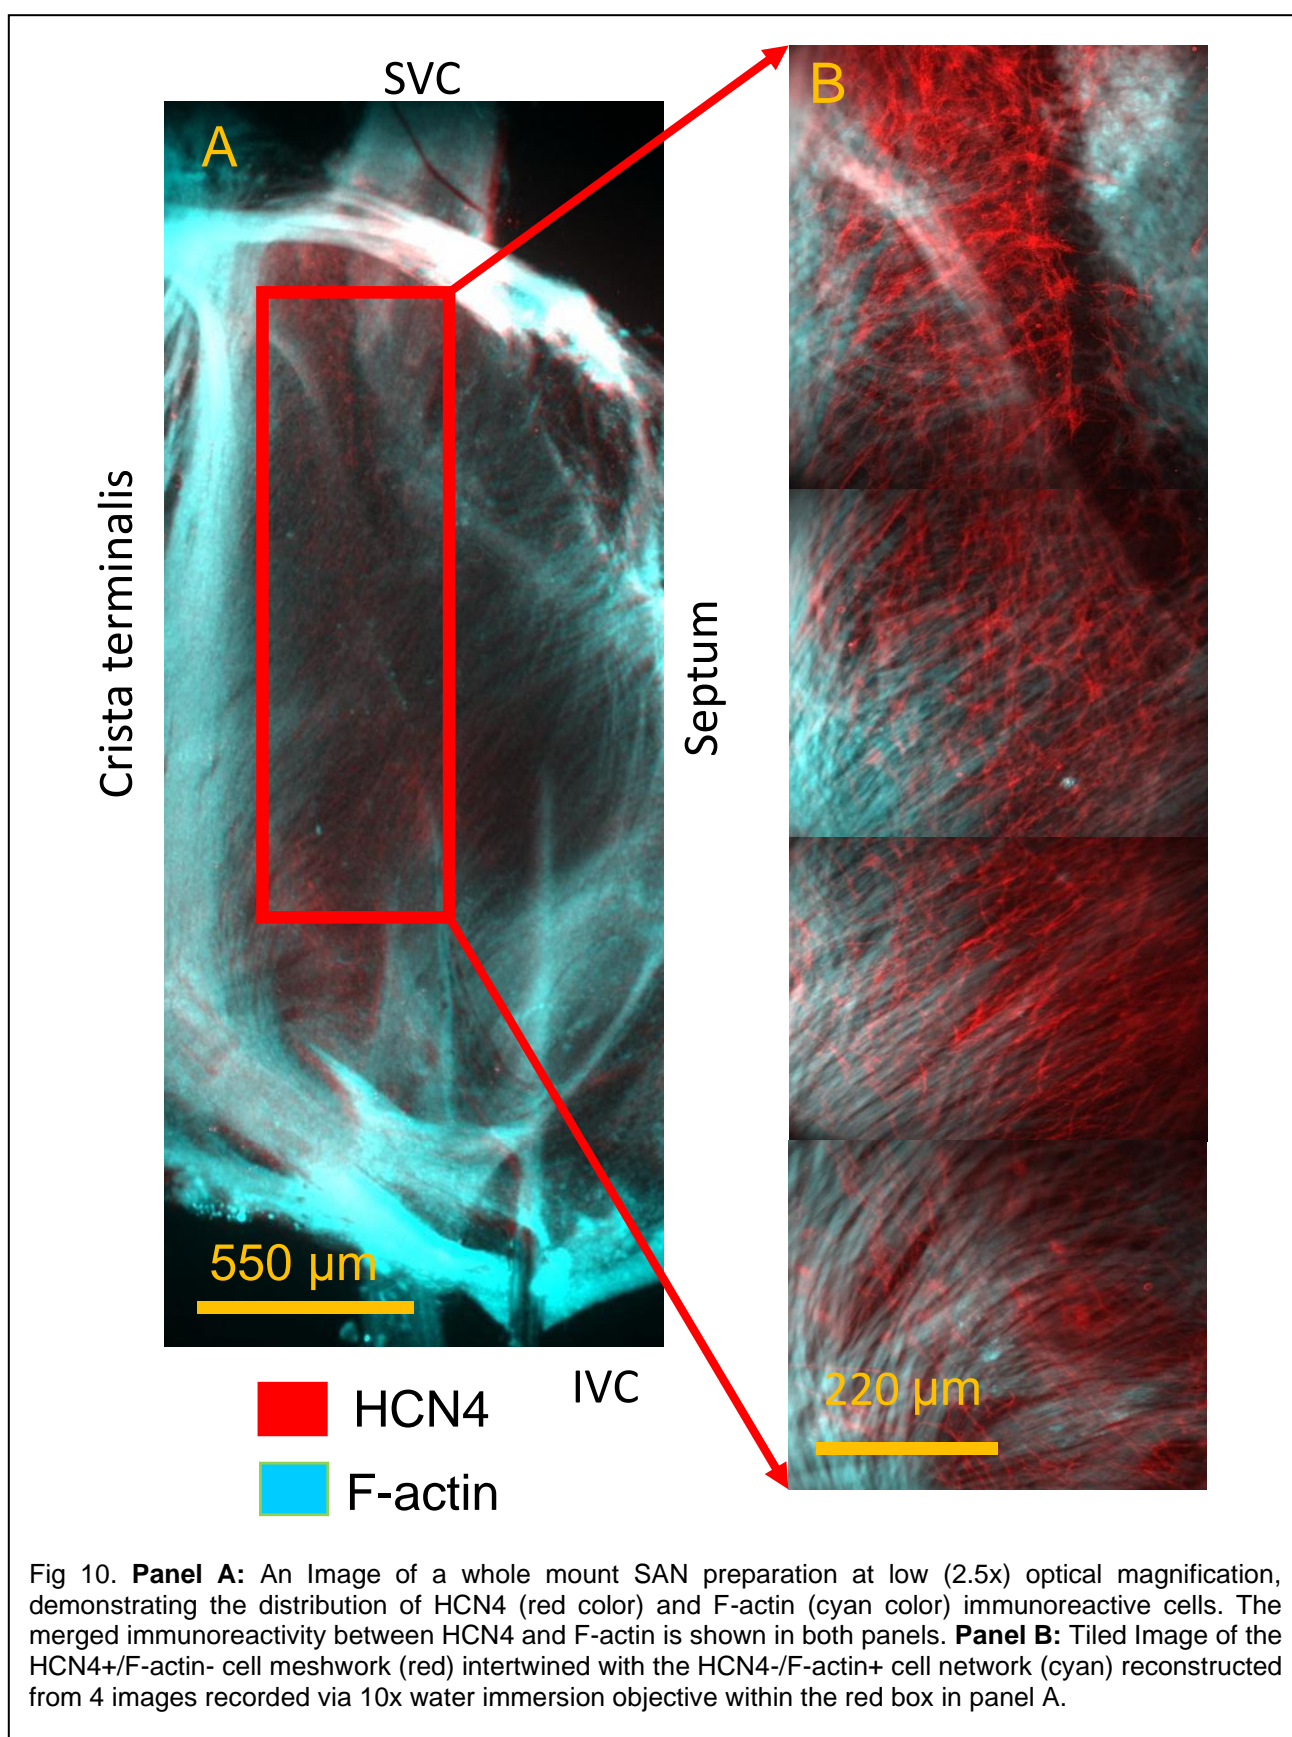

Typical HCN4 positive cells in the central SAN visualized at higher magnification had shapes similar to those in which cell  $Ca^{2+}$  was imaged using  $Ca^{2+}$  indicator Fluo-4AM (Fig 11). Three types of cell shapes, elongated, spindle and spider type, reported previously were observed: Elongated cells had relatively uniform thickness of 2-5  $\mu\text{m}$  from end to end and were 100-200  $\mu\text{m}$  in length. Spindle cells were shorter and thicker than elongated with 7-15  $\mu\text{m}$  thick center thinned to edges. Spider type cells had thick cell bodies of 7-15  $\mu\text{m}$  and lengths of 50-80  $\mu\text{m}$  and remarkably projected **multiple thin branches** towards neighboring cells (resembling to telopodes). We also identified a fourth type of cell, not described previously, having pyramidal-like cell bodies with a 15-20  $\mu\text{m}$  base from which thin processes, similar to those of spider type cells, projected towards neighboring cells (Fig 11G).

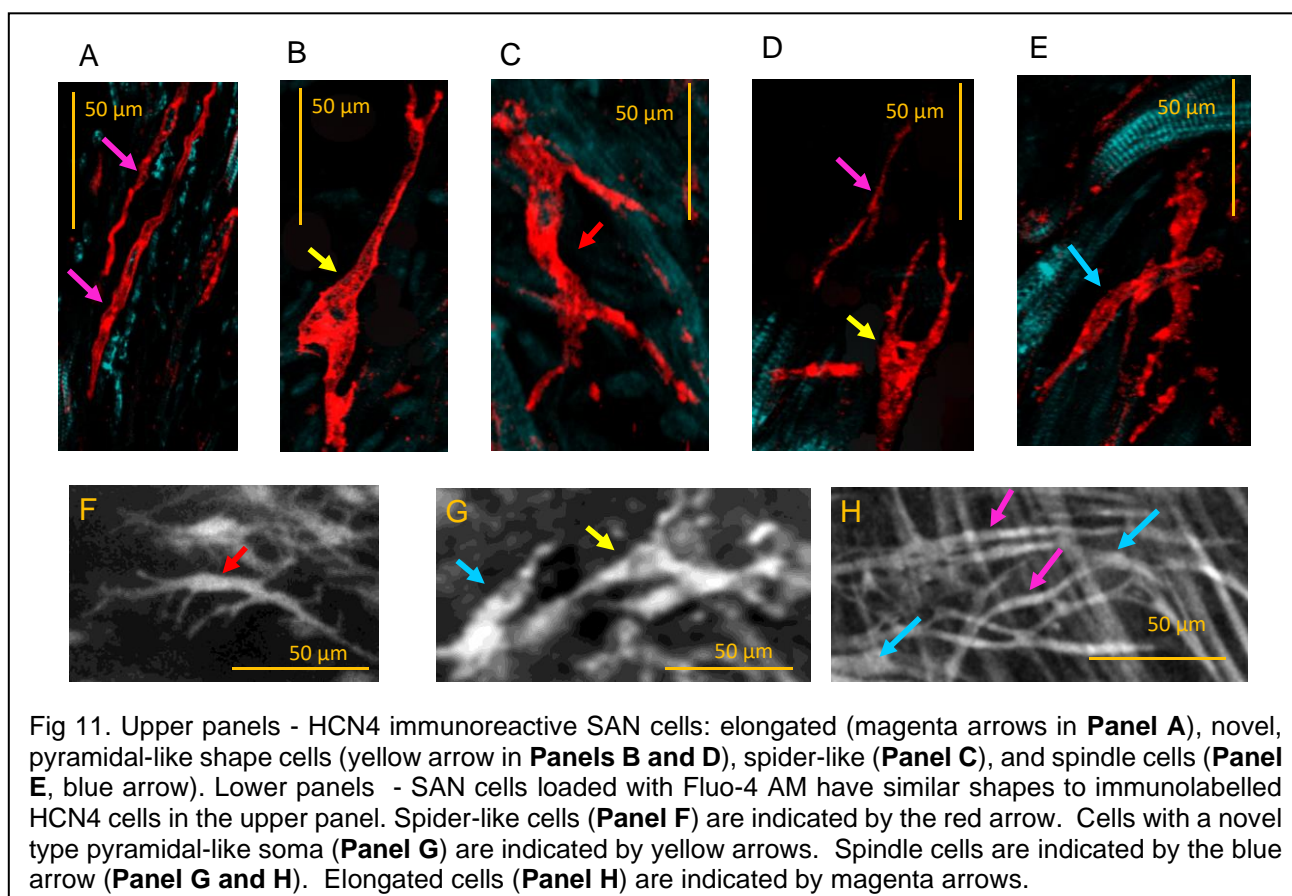

The cytoarchitecture of intercellular connections between HCN4 cells resembled a mesh type alignment [28] in which cells within a web have numerous fine cellular branches, creating a high-density mesh of interlacing branches. Surface membranes of neighboring HCN4 cells within the dense part of the continuous HCN4 meshwork were so close to each other that it was often difficult to discern cells. HCN4 labeled both the cell body and peripheral branches of these cells resembling a neurite-like arborization. Confocal imaging showed that HCN4-positive cells were equally distributed between the epicardium and endocardium. (Fig 12C), indicating that the HCN4 cell meshwork cytoarchitecture permeated the entire thickness of the SAN (Fig 12 A and B).

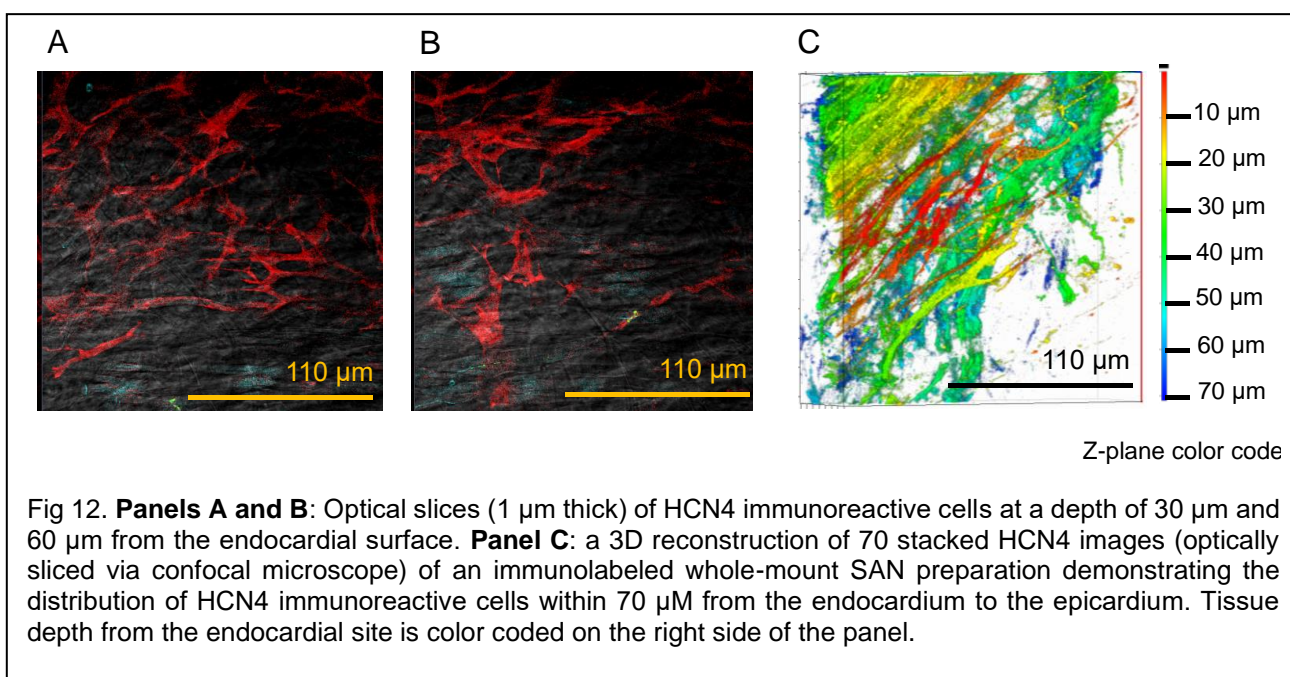

### **HCN4 and F-actin co-immunolabeling**

Panoramic views of SANs shown at low optical magnification of co-immunolabeled whole-mount SAN preparations with HCN4 and F-actin (using phalloidin, a specific F-actin marker)(Fig 10), uncovered a pattern of intertwining between HCN4-expressing cells (red

color mesh-type network) and F-actin expressing cells (elongated cells blue color network in Fig 10). Although some SAN cells co-immunolabeled positively for both HCN4 and phalloidin, the majority of HCN4-positive cells were F-actin negative. Many cells, however, were F-actin positive and HCN4 negative, allowing entire visualization of two distinctly immunolabeled networks within SAN tissue: HCN4+/F-actin- and HCN4-/F-actin+ (Fig 10).

Confocal optical slicing of SAN tissue to create a series of images over sequential increments of 1  $\mu\text{m}$  in depth (Fig 13) revealed the fine structural details of the intertwining of the HCN4 cell meshwork and F-actin immunolabelled cell network. Side views of the reconstructed Z-stack images in Fig 13 (Panel B) demonstrated penetration of HCN4-/F-actin+ SAN cells (blue color) into the HCN4+/F-actin- meshwork (red color). The apparent absence of intercellular spaces between the two types of cells suggests that surface membranes of each cell are adjacent to each other. HCN4+/F-actin- cells also penetrated the HCN4-/F-actin+ network of cells, often aligning with HCN4-/F-actin+ cells in a 3D orientation.



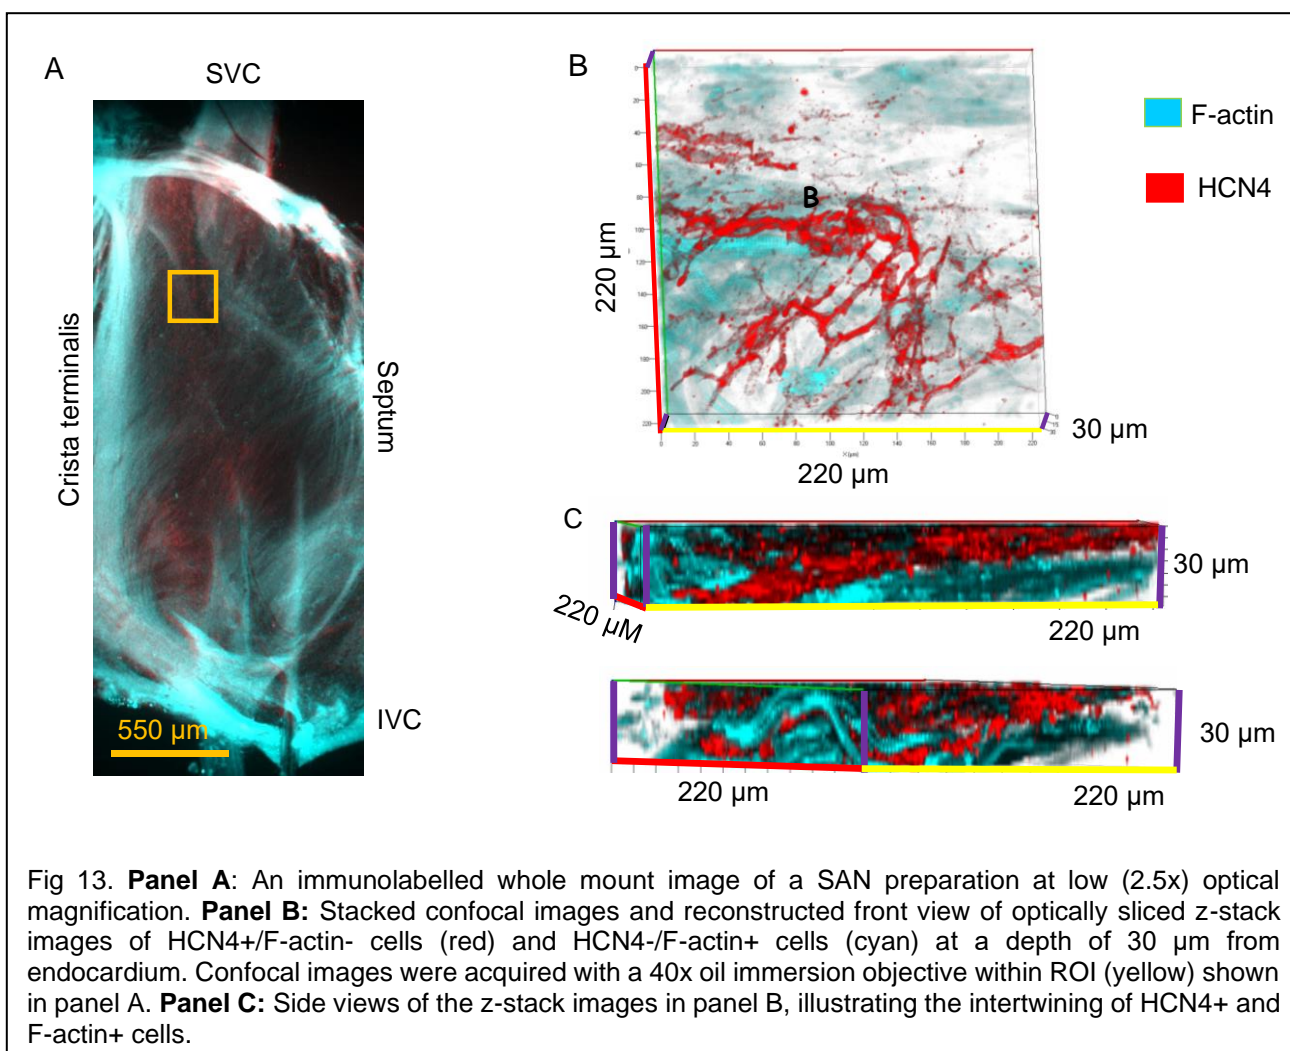

Fig 13. **Panel A:** An immunolabelled whole mount image of a SAN preparation at low (2.5x) optical magnification. **Panel B:** Stacked confocal images and reconstructed front view of optically sliced z-stack images of HCN4+/F-actin- cells (red) and HCN4-/F-actin+ cells (cyan) at a depth of 30  $\mu\text{m}$  from endocardium. Confocal images were acquired with a 40x oil immersion objective within ROI (yellow) shown in panel A. **Panel C:** Side views of the z-stack images in panel B, illustrating the intertwining of HCN4+ and F-actin+ cells.

### **HCN4 and CX43 co-immunolabeling**

Dual HCN4 and CX43 immunolabeling of whole mount SAN preparations revealed that the central SAN HCN4+ cell meshwork was largely devoid of CX43 (HCN4+/CX43-), and that striated HCN4-negative cells were CX43-positive (HCN4-/CX43+). Images taken in bright field fluorescent microscope showed that the HCN4 cell meshwork (Fig 14 red color) and CX43 cell network (green color) become intertwined throughout the central SAN from the SVC to IVC. CX43 antibody-labeled membrane proteins observed as green dots (Fig 14C) align at the perimeter or at the ends of cells and clearly define the cell borders, revealing points of intercellular communication between CX43 expressing SAN cells. Of note, CX43

immunolabeling was not observed on the cell membranes of HCN4+ cells. The co-localization of two cell types can be observed in optical slices of the SAN obtained from intertwining areas (middle and lower image Fig 14C) in which HCN4+ cells come close to CX43+ cells but do not overlap. The continuity of CX43+-coupled cell network is therefore disrupted by HCN4+ cells that do not express CX43 proteins.

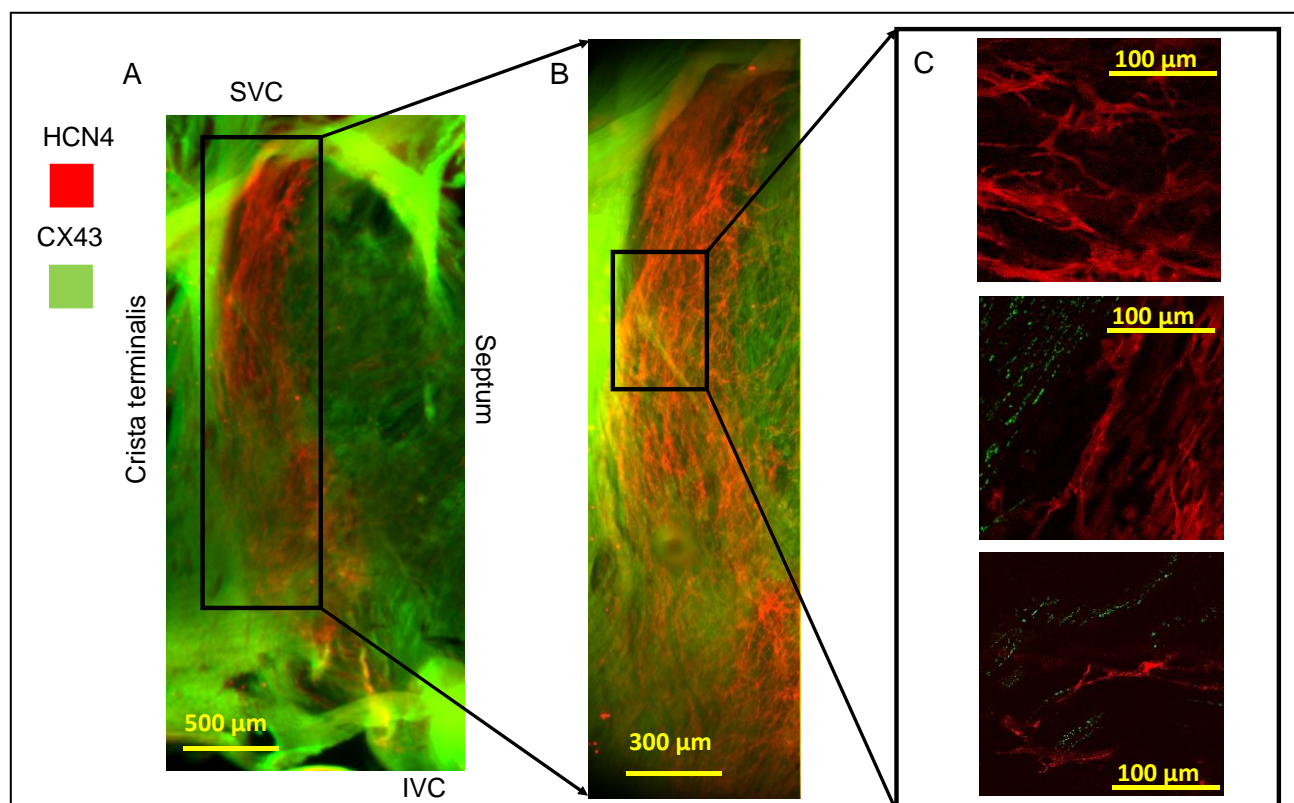

Fig 14. **Panel A:** A dual immunolabeled HCN4 (red) and CX43 (green) whole mount SAN image at low optical magnification (2.5x). Merged (CX43 and HCN4) immunoreactivity is shown in all three panels. **Panel B:** Image within the ROI in panel A reconstructed from 4 images of the HCN4+/CX43- meshwork (red) intertwined with HCN4-/CX43+ network (green) taken with 10x water immersion objective. **Panels C:** Confocal images from the area within the ROI in panel B showing: HCN4 positive cells that do not express CX43 (upper image); and intertwining areas between HCN4+/CX43- meshwork (red color), and penetrating HCN4-/CX43+ cells outlined by green dots corresponding to CX43 protein on the cell membranes (middle and lower panel). Note that HCN4 expressing cells in all three images do not express CX43.

## Discussion

### SAN cytoarchitecture

Dual immunolabeling of whole mount SAN preparations indicated that in addition to a HCN4+/CX43- meshwork, there is a network of F-actin+/CX43+ that intertwines with HCN4 meshwork in relatively narrow interface zones. The cytoarchitecture of HCN4 meshwork and F-actin+ expressing cell network however could not be categorically defined as a gradient or mosaic network [1]. In contrast to HCN4 expressing cells, the striated F-actin expressing cells do not form a meshwork, but rather a network type of cells connected via Cx43, that is characterized by a repetitive pattern equal across entire central SAN. F-actin expressing cells do not appear to be inserted between HCN4+ cells and thus do not interrupt continuity of HCN4+ within meshwork. Three-dimensional reconstruction of optically sliced intertwining areas in whole mount SAN preparations showed that cells from HCN4+/F-actin- meshwork and HCN4-/F-actin+ network appear to integrate into a single structural unit. In other words, F-actin+ and HCN4+ cells were located so close to each other that an intracellular space between them could not be resolved, even with a 40x objective.

A distinction between cells within the intertwining HCN4 meshwork and F-actin network in the present study is that the majority of cells within the HCN4 meshwork are CX43 negative that is in line with the results of prior studies describing properties of the central SAN cells [25, 29].

In addition to detecting three shapes: elongated, spindle and spider type HCN4+ cells described previously [30], novel finding of the present study is the identification of SAN cells having a pyramidal like cell body from which thin branches extended to neighboring cells within HCN4 meshwork (see Fig 12).

## **Ca<sup>2+</sup> signals within SAN tissue**

We devised a specific experimental approach to record Ca<sup>2+</sup> signals to query whether pacemaker cells imbedded in SAN tissue operate via an LCR-linked AP firing paradigm discovered in isolated cells, but on a higher, more complex, functional scale within the multi-cellular ensemble. We quantified Ca<sup>2+</sup> signals across the SAN at both low and higher magnification to study fine details of LCRs with respect to AP generation manifest as APCTs.

## **Discontinuous APCT occurrence across the SAN**

Our first novel finding was that following initially appearing APCTs near the SVC, following variable delays APCTs appeared discontinuously in other parts of the SAN (c.f. Figs 3, 4 and 5). This pattern of discontinuous APCT occurrence at remote sites following appearance at an initiation site is consistent with the idea of self-organized synchronization of loosely coupled network [31] of cell oscillators within different parts of SAN tissue (aka pacemaker cell mutual entrainment suggested by Jalife [12]). This idea of self-organized synchronization within the SAN pacemaker cell network differs from interpretations of many previous studies i.e. that pacemaker cells within an initiation site generate an impulse that spreads in “concentric” pattern, overdriving other SAN cells that oscillate at slower spontaneous frequencies [6-9].

## **Ca<sup>2+</sup> signals within cells embedded in SAN tissue are highly heterogeneous in phase, frequency, and amplitude**

Our results are, in part, consistent with the theory of mutual entrainment of SAN cell oscillators via a democratic process [12, 13], but that theory considered that all cells oscillate at the same frequency but out of phase and have the same amplitude; whether oscillations



differ in amplitudes was not addressed. In other terms, the mutual entrainment theory postulated that all signals must be all or none (i.e. a full-scale AP) while firing at a common rate with the differences in phase. Thus, a second novel finding of our study is that visualization of HCN4+ cells in the central SAN tissue at higher magnification revealed Ca<sup>2+</sup> signals that were highly heterogeneous among cells not only in phase, but also in frequency and amplitude (c.f. Fig 6). Importantly, local Ca<sup>2+</sup> dynamics of cells within the HCN4 meshwork differed within clusters of cells: some cells generated only LCRs and did not fire APCTs; some only generated APCTs, manifested as synchronized bright flashes throughout the cell; and in some cells LCRs appeared during the diastolic phase prior to an APCT occurrence in that cell (c.f. Fig 7) resembling those generated by a coupled-oscillator system described in single SAN cells in isolation [19]. Importantly, cells can generate APCTs both steadily and in bursts (Fig 6).

A novel type of LCR and APCT interaction was also revealed, in which APCTs within a cluster of cells appear, with a delay following LCRs occurrence in **adjacent** cells that generated only LCRs, but not APCTs (see c.f. Figs 8 and 9). This spectrum of cell behaviors observed within the central SAN suggests that some cells within clusters coordinate their activity via intercellular entrainment, and different clusters of cells via inter-cluster entrainment. This crucial difference between the democratic theory of mutual entrainment [13] and our results is that we have demonstrated that cell Ca<sup>2+</sup>oscillations not only differ in phase but also in frequency and amplitude. This pattern of Ca<sup>2+</sup> signals differing both in phase, frequency, and amplitude among clusters of cells within SAN tissue adds a new dimension of complexity to factors involved AP generation within SAN cell networks.

Recent numerical studies of SAN network suggest importance of Ca<sup>2+</sup> clock activation for robust impulse generation and resistance against annihilation [32]. Our results show that

LCRs in pacemaker cells embedded within SAN tissue have different entrainment patterns with respect to AP generation informed on by APCTs. One pattern is consistent with that previously discovered in single SAN cells operating in isolation in which LCRs precede APCT, confirming that the coupled oscillator theory discovered in isolated single SAN cells [19] is operational in cells within the intact SA node. Here we show that the coupled oscillator theory, however, operates at a higher and much more complex level within the network of cells comprising the SAN tissue. In other terms, we observed greater freedom and diversity with respect to  $\text{Ca}^{2+}$  cycling in cells embedded in SAN tissue than in single isolated SAN cells: many cells within SAN tissue did not fire APCTs, but generated substantial number of LCRs that varied in amplitude, frequency, and rhythmicity (see next section).

### **Some SAN cells have LCRs but do not fire APs**

An additional discovery of the present study, that some cells in SAN tissue do not fire APs, is in line with the idea put forth by Ophtof et al. [33], i.e. only a fraction of cells (~25%) embedded in SAN tissue participate in generating AP in any given electrical impulse that emanate from SAN node. We have also recently observed similar non-AP-firing behaviours in a population of enzymatically isolated guinea pig and human SAN cells: these cells have LCRs but do not fire APs [34, 35]. A large population of these dormant isolated SAN cells begin to fire spontaneous APs in response to increases in intracellular cAMP [34, 36]. Such dormant cell behaviour within SAN tissue can potentially contribute to pacemaker function via (i) having a role in entrainment of oscillators that are heterogeneous both in phase and amplitude to self-organize into synchronized signals that underlie rhythmic impulse that emanate from the SAN; and (ii) their recruitment to fire APs in response to adrenergic receptor activation or AP silencing in response to cholinergic receptor stimulation.

## Microscale signalling within SAN

The fine details of the novel micro-scale signaling paradigm within SAN tissue discovered here is reminiscent of complex information processing among clusters of neurons that create spatiotemporal synchronization of signals that drive neuronal network functions. Examples of this is type of behavior have been observed within the autonomic neural-visceral axis via its modulation of rhythms of peripheral organ function. One example is the network of interstitial cells of Cajal (ICC) that generate spontaneous  $\text{Ca}^{2+}$  signals to activate adjacent smooth muscle cells to effect gut motility [37]. Another example occurs within the brain stem: one type of neurons, cells of preBötzingler Complex (preBötC), create spontaneous signals that activate adjacent cells (e.g. Bötzingler cells) to generate impulses that travel within nerve from the brain to the diaphragm to regulate automatic breathing [38]. It has been hypothesized that only a small fraction of preBötC cells within the network is required to initiate each excitatory cycle and that the initiating preBötC cells differ from cycle to cycle [39]. A major premise of this hypothesis is that spontaneous activity is initiated within a few preBötC cells and induces activity in other preBötC cells and this excitation percolates throughout the network building to a crescendo that initiates inspiration signals. We may envision that networks of pacemaker cells within SAN tissue generate local  $\text{Ca}^{2+}$  signals that are similar to those of preBötC in conjunction with signals from the heart's little brain, i.e. the network of autonomic ganglia embedded within the atrial epicardium [40].

Self-organization of local signals among cells in a crescendo-like manner generates an electrical impulse that exits the SAN. This self-organization of local  $\text{Ca}^{2+}$  signals among cells within SAN tissue recapitulates the self-organization of local  $\text{Ca}^{2+}$  signals that leads to AP firing within individual pacemaker cells studied in isolation [19]. This self-similar organization

of local  $\text{Ca}^{2+}$  signals across scales from cells to tissue can be envisioned as a fractal-like behavior. In other terms, while each LCR is a small, subthreshold signal, the emergent LCR ensemble signals critically contribute to generation of spontaneous APs within and among SAN cells.

Anomalous rectification that keeps diastolic membrane potential positive to the potassium equilibrium potential is a characteristic of HCN4 channels. Anomalous rectification is crucial for the functions of coupled oscillator systems not only for SAN cells in isolation [17, 41] and in pacemaker cells embedded in SAN tissue, but also for similar systems operative in brain [42]. Cells that exhibit coupled oscillator behavior within the central SAN, like many brain neurons and ICC, express HCN4 (Figs 11-14).

Immunolabeled cells embedded within the HCN4 meshwork and cells loaded with Fluo-4 within the central SAN had similar shapes. It is noteworthy that regardless their soma shape, all manifested LCRs. The topology of the HCN4 meshwork delineated by immunolabeling may be a requirement for crescendo-like self-organization of heterogeneous local  $\text{Ca}^{2+}$  signals observed in our study. In computer research meshwork properties are categorized by physical and logical topologies [43, 44]: physical topology relates to how the various components are placed within a network, e.g. ring, bus, mesh, or star networks; while logical topology illustrates how data flows among network components. Within a meshwork the infrastructure nodes (or infrastructure devices) connect directly, non-hierarchically to as many other nodes as possible, and cooperate with one another to route signals to the meshwork outputs. In this context, the soma of HCN4 expressing cells appear as nodes within a network with cytoarchitectural features connected via multiple branches, resembling neuronal arborization [45] that are variable and show similar topology throughout central SAN. Obscure cell borders between HCN4+ cells likely create contiguous pathways from cell

to cell within the HCN4 meshwork. This structure is, in fact, similar to interstitial telocyte networks recently discovered in numerous tissues, including heart [46]. Of note, the original name for telocytes, in fact, was interstitial cells of Cajal. Camillo Cajal was shared the Nobel Prize In 1906 (with Camillo Golgi) for their work on the structure of the nervous system (<https://www.nobelprize.org/prizes/medicine/1906/summary/>).

The lack of structural continuity defined by cell to cell connections via one type, CX43, of gap junctions suggests a degree of autonomy of the HCN4+ cells from electrical behavior throughout the central SAN. Moreover, a discontinuity of CX43 expression suggests that complex  $Ca^{2+}$  dynamics within some HCN4+ cells may not be externally reset by AP occurrence in neighboring cells. The failure of APCTs to reappear within the area near the initiation site during a given AP cycle may be explained on the basis of lack of CX43 in the HCN4+ positive SAN cells that prompted the initiation of the impulse.

An unresolved issue is how HCN4 cells without CX43 communicate with each other and how they communicate with cells of the Cx43 network. Whether another type of connexin besides CX43, may connect HCN4+ cells is a moot issue awaiting specific antibodies to other connexins; e.g. Cx45 and Cx30.2 thought to be present within the center of the SAN [25]. Even if cells within HCN4 meshwork are connected via unidentified type of gap junction proteins, lack of structural continuity between CX43-negative meshwork to CX43-positive network would remain. The close proximity of two different cells types creates an interface of possible electrical or chemical communication between two networks (see Fig 13). Transmission of  $Ca^{2+}$  and electrical signals from HCN4+-meshwork to F-actin+-network would be expected to occur in these intertwining areas.

Transition of the signal between intertwined cells from HCN4+/F-actin- cells to HCN4-/F-actin+ cells that express different types of connexins would be expected to occur with a

loss of signal amplitude and duration as reported for electrical synapses <https://www.sciencedirect.com/topics/neuroscience/electrical-synapse>. Indeed, sharp transitions in AP waveforms over small distances of 100  $\mu\text{m}$  that occur within the mouse central SAN [47, 48] are similar to differences in shapes of APs that occur during the transfer of electrical signal from pre to postsynaptic neuron through the electrical synapses [49].

Although the field of SAN biology has been dominated by the idea that electrotonic or electro-aptic impulses dominate communication among SAN cells, there is a plethora of evidence that other types of signaling occur between cells. One is mechanical [50]. Other types of cell-to-cell communications, though, not yet demonstrated in SAN tissue, include ephaptic [51], photons emitted from intracellular chromophores [52, 53], cellular vibrations transmitted or reflected as electromagnetic waves [54], a gas, e.g. NO, HS or CO [55], or a lipid signal generated acutely by arachidonic acid degradation, as in retrograde-grade endogenous cannabinoids signaling in the brain [56]. Because any of these types of cell-to-cell communications may occur among cells within SAN tissue, the foremost frontier for the field of cardiac pacemaker biology is to understand how HCN4 cells communicate with each other within the HCN4 meshwork, and how they communicate signals to the CX43 cells.

In summary, our results add additional insight into the structural and functional complexity of SAN tissue [1, 57].

- 1) APCTs appear discontinuously within SAN with variable delays following their initial appearance close to the SVC-crista terminalis intersection.

- 2) A dense meshwork of HCN4+ cells in the central intercaval region differs in cytoarchitecture from a striated F-actin network. The HCN4+/CX43- and F-actin+/CX43+ cells intertwine within a narrow interface zones to create an anatomical unit in which the intertwining areas appear to be the functional interface at which electrical and chemical

signals are transmitted between the two cellular networks. Further intense study, however, is required to understand how HCN4 cells devoid CX43 signal to each other within HCN4 meshwork and how these cells signal to CX43+/F-actin+ expressing cells.

3) Oscillatory  $\text{Ca}^{2+}$  signals including both those occurring locally, i.e. spontaneous LCRs, and those induced by APs (i.e. APCTs) that occur within clusters of cells comprising SAN tissue are markedly heterogeneous. In some resident SAN cells, LCRs generated in the diastolic phase appear to ignite APCTs in SAN cells, suggesting that a coupled-oscillator mechanism found in isolated pacemaker cells also operates in some cells embedded within SAN tissue. The LCR-APCT coupling among cells embedded in intact SAN tissue, however, is more complex than observed in single isolated SAN cells.

4) Finally, our results demonstrate that signals generated by the SAN cell oscillators are more heterogeneous than previously formulated, including differences in amplitudes, frequencies, and discontinuities. They indicate the need for modification of the previously described elegant operational paradigm depicting resident SAN cells as a democracy involving mutual entrainment that effects a common single rate of full-amplitude APs with different local phases. Our results demonstrate novel complexity of signals of cells embedded within SAN tissue at a lower (deeper) level of events including both subcellular and whole-cell origin (i.e. within and among SAN cells). Synchronized macroscopic signals within the SA node, including full-scale APs, emerge from heterogeneous microscopic subthreshold  $\text{Ca}^{2+}$  signals. This signal complexity underlies robust impulse generated by the SAN and appears as a democracy at the higher level of synchronized AP generation described at a lower resolution in prior electrophysiological studies or imaging of  $\text{Ca}^{2+}$  and electrical signals.



## Acknowledgements

This work was supported by the Intramural Research Program of the NIH, National Institute on Aging.

**Disclosures:** None

## References

- [1] M.R. Boyett, H. Honjo, I. Kodama, The sinoatrial node, a heterogeneous pacemaker structure, *Cardiovascular research*, 47 (2000) 658-687.
- [2] A. Keith, M. Flack, The Form and Nature of the Muscular Connections between the Primary Divisions of the Vertebrate Heart, *J Anat Physiol*, 41 (1907) 172-189.
- [3] H. Zhang, A.V. Holden, M.R. Boyett, Gradient model versus mosaic model of the sinoatrial node, *Circulation*, 103 (2001) 584-588.
- [4] H. Inokaitis, N. Pauziene, K. Rysevaite-Kyguoliene, D.H. Pauza, Innervation of sinoatrial nodal cells in the rabbit, *Ann Anat*, 205 (2016) 113-121.
- [5] T.A. Quinn, P. Kohl, Mechano-sensitivity of cardiac pacemaker function: pathophysiological relevance, experimental implications, and conceptual integration with other mechanisms of rhythmicity, *Progress in biophysics and molecular biology*, 110 (2012) 257-268.
- [6] W.K. Bleeker, A.J. Mackaay, M. Masson-Pevet, L.N. Bouman, A.E. Becker, Functional and morphological organization of the rabbit sinus node, *Circulation research*, 46 (1980) 11-22.
- [7] I.R. Efimov, V.P. Nikolski, G. Salama, Optical imaging of the heart, *Circulation research*, 95 (2004) 21-33.
- [8] D. Lang, V. Petrov, Q. Lou, G. Osipov, I.R. Efimov, Spatiotemporal control of heart rate in a rabbit heart, *Journal of electrocardiology*, 44 (2011) 626-634.
- [9] N. Li, B.J. Hansen, T.A. Csepe, J. Zhao, A.J. Ignozzi, L.V. Sul, S.O. Zakharkin, A. Kalyanasundaram, J.P. Davis, B.J. Biesiadecki, A. Kilic, P.M.L. Janssen, P.J. Mohler, R. Weiss, J.D. Hummel, V.V. Fedorov, Redundant and diverse intranodal pacemakers and conduction pathways protect the human sinoatrial node from failure, *Sci Transl Med*, 9 (2017).
- [10] T. Sano, T. Sawanobori, H. Adaniya, Mechanism of rhythm determination among pacemaker cells of the mammalian sinus node, *The American journal of physiology*, 235 (1978) H379-384.
- [11] A.T. Winfree, Biological rhythms and the behavior of populations of coupled oscillators, *Journal of theoretical biology*, 16 (1967) 15-42.
- [12] J. Jalife, Mutual entrainment and electrical coupling as mechanisms for synchronous firing of rabbit sinoatrial pace-maker cells, *The Journal of physiology*, 356 (1984) 221-243.
- [13] D.C. Michaels, E.P. Matyas, J. Jalife, Mechanisms of sinoatrial pacemaker synchronization: a new hypothesis, *Circulation research*, 61 (1987) 704-714.
- [14] J.M. Anumonwo, M. Delmar, A. Vinet, D.C. Michaels, J. Jalife, Phase resetting and entrainment of pacemaker activity in single sinus nodal cells, *Circulation research*, 68 (1991) 1138-1153.
- [15] R.B. Schuessler, J.P. Boineau, B.I. Bromberg, Origin of the sinus impulse, *J Cardiovasc Electrophysiol*, 7 (1996) 263-274.
- [16] E.E. Verheijck, R. Wilders, R.W. Joyner, D.A. Golod, R. Kumar, H.J. Jongsma, L.N. Bouman, A.C. van Ginneken, Pacemaker synchronization of electrically coupled rabbit sinoatrial node cells, *The Journal of general physiology*, 111 (1998) 95-112.
- [17] D. DiFrancesco, The role of the funny current in pacemaker activity, *Circulation research*, 106 (2010) 434-446.



- [18] V.A. Maltsev, E.G. Lakatta, Synergism of coupled subsarcolemmal  $Ca^{2+}$  clocks and sarcolemmal voltage clocks confers robust and flexible pacemaker function in a novel pacemaker cell model, *American journal of physiology*, 296 (2009) H594-H615.
- [19] E.G. Lakatta, V.A. Maltsev, T.M. Vinogradova, A coupled SYSTEM of intracellular  $Ca^{2+}$  clocks and surface membrane voltage clocks controls the timekeeping mechanism of the heart's pacemaker, *Circulation research*, 106 (2010) 659-673.
- [20] A.E. Lyashkov, J. Behar, E.G. Lakatta, Y. Yaniv, V.A. Maltsev, Positive Feedback Mechanisms among Local Ca Releases, NCX, and I $CaL$  Ignite Pacemaker Action Potentials, *Biophysical journal*, 114 (2018) 1176-1189.
- [21] A.V. Maltsev, V.A. Maltsev, M. Mikheev, L.A. Maltseva, S.G. Sirenko, E.G. Lakatta, M.D. Stern, Synchronization of stochastic  $Ca^{2+}$  release units creates a rhythmic  $Ca^{2+}$  clock in cardiac pacemaker cells, *Biophysical journal*, 100 (2011) 271-283.
- [22] T.M. Vinogradova, D.X. Brochet, S. Sirenko, Y. Li, H. Spurgeon, E.G. Lakatta, Sarcoplasmic reticulum  $Ca^{2+}$  pumping kinetics regulates timing of local  $Ca^{2+}$  releases and spontaneous beating rate of rabbit sinoatrial node pacemaker cells, *Circulation research*, 107 (2010) 767-775.
- [23] T.M. Vinogradova, Y.Y. Zhou, K.Y. Bogdanov, D. Yang, M. Kuschel, H. Cheng, R.P. Xiao, Sinoatrial node pacemaker activity requires  $Ca^{2+}$ /calmodulin-dependent protein kinase II activation, *Circulation research*, 87 (2000) 760-767.
- [24] J. Wu, M. Biermann, M. Rubart, D.P. Zipes, Cytochalasin D as excitation-contraction uncoupler for optically mapping action potentials in wedges of ventricular myocardium, *J Cardiovasc Electrophysiol*, 9 (1998) 1336-1347.
- [25] M.R. Boyett, S. Inada, S. Yoo, J. Li, J. Liu, J. Tellez, I.D. Greener, H. Honjo, R. Billeter, M. Lei, H. Zhang, I.R. Efimov, H. Dobrzynski, Connexins in the sinoatrial and atrioventricular nodes, *Adv Cardiol*, 42 (2006) 175-197.
- [26] T.M. Vinogradova, Y.Y. Zhou, V. Maltsev, A. Lyashkov, M. Stern, E.G. Lakatta, Rhythmic ryanodine receptor  $Ca^{2+}$  releases during diastolic depolarization of sinoatrial pacemaker cells do not require membrane depolarization, *Circulation research*, 94 (2004) 802-809.
- [27] S. Zicha, M. Fernandez-Velasco, G. Lonardo, N. L'Heureux, S. Nattel, Sinus node dysfunction and hyperpolarization-activated (HCN) channel subunit remodeling in a canine heart failure model, *Cardiovascular research*, 66 (2005) 472-481.
- [28] D.H. Pauza, K. Rysevaite, H. Inokaitis, M. Jokubauskas, A.G. Pauza, K.E. Brack, N. Pauziene, Innervation of sinoatrial nodal cardiomyocytes in mouse. A combined approach using immunofluorescent and electron microscopy, *Journal of molecular and cellular cardiology*, 75 (2014) 188-197.
- [29] H. Honjo, M.R. Boyett, S.R. Coppen, Y. Takagishi, T. Opthof, N.J. Severs, I. Kodama, Heterogeneous expression of connexins in rabbit sinoatrial node cells: correlation between connexin isotype and cell size, *Cardiovascular research*, 53 (2002) 89-96.
- [30] E.E. Verheijck, A. Wessels, A.C. van Ginneken, J. Bourier, M.W. Markman, J.L. Vermeulen, J.M. de Bakker, W.H. Lamers, T. Opthof, L.N. Bouman, Distribution of atrial and nodal cells within the rabbit sinoatrial node: models of sinoatrial transition, *Circulation*, 97 (1998) 1623-1631.
- [31] C.A. Del Negro, G.D. Funk, J.L. Feldman, Breathing matters, *Nat Rev Neurosci*, 19 (2018) 351-367.
- [32] K. Li, Z. Chu, X. Huang, Annihilation of the pacemaking activity in the sinoatrial node cell and tissue AIP *Advances*, 8 (2018) 125319.
- [33] T. Opthof, B. de Jonge, M. Masson-Pevet, H.J. Jongsma, L.N. Bouman, Functional and morphological organization of the cat sinoatrial node, *Journal of molecular and cellular cardiology*, 18 (1986) 1015-1031.
- [34] M.S. Kim, A.V. Maltsev, O. Monfredi, L.A. Maltseva, A. Wirth, M.C. Florio, K. Tsutsui, D.R. Riordon, S.P. Parsons, S. Tagirova, B.D. Ziman, M.D. Stern, E.G. Lakatta, V.A. Maltsev, Heterogeneity of calcium clock functions in dormant, dysrhythmically and rhythmically firing single pacemaker cells isolated from SA node, *Cell calcium*, 74 (2018) 168-179.
- [35] K. Tsutsui, O. Monfredi, S.G. Sirenko-Tagirova, L.A. Maltseva, R. Bychkov, M.S. Kim, B.D. Ziman, K.V. Tarasov, Y.S. Tarasova, J. Zhang, M. Wang, A.V. Maltsev, J.A. Brennan, I.R. Efimov, M.D. Stern, V.A. Maltsev, E.G. Lakatta, A coupled-clock system drives the automaticity of human sinoatrial nodal pacemaker cells, *Science signaling*, 11 (2018) eaap7608.

- [36] K. Tsutsui, M.S. Kim, A.N. Wirth, O. Monfredi, B.D. Ziman, R. Byshkov, A.V. Maltsev, V.A. Maltsev, E.G. Lakatta, Electrically dormant sinoatrial nodal cells (SAN) are awakened by increased camp-dependent phosphorylation of coupled-clock proteins, *Biophysical journal*, 112 (2017) 402a-403a.
- [37] M.Y. Lee, S.E. Ha, C. Park, P.J. Park, R. Fuchs, L. Wei, B.G. Jorgensen, D. Redelman, S.M. Ward, K.M. Sanders, S. Ro, Transcriptome of interstitial cells of Cajal reveals unique and selective gene signatures, *PLoS One*, 12 (2017) e0176031.
- [38] J.L. Feldman, K. Kam, Facing the challenge of mammalian neural microcircuits: taking a few breaths may help, *The Journal of physiology*, 593 (2015) 3-23.
- [39] K. Kam, J.W. Worrell, C. Ventalon, V. Emiliani, J.L. Feldman, Emergence of population bursts from simultaneous activation of small subsets of preBotzinger complex inspiratory neurons, *J Neurosci*, 33 (2013) 3332-3338.
- [40] J.A. Armour, Potential clinical relevance of the 'little brain' on the mammalian heart, *Exp Physiol*, 93 (2008) 165-176.
- [41] E.G. Lakatta, D. DiFrancesco, What keeps us ticking: a funny current, a calcium clock, or both?, *Journal of molecular and cellular cardiology*, 47 (2009) 157-170.
- [42] N. Kopell, G. LeMasson, Rhythmogenesis, amplitude modulation, and multiplexing in a cortical architecture, *Proceedings of the National Academy of Sciences of the United States of America*, 91 (1994) 10586-10590.
- [43] M. Chiang, M. Yang, Towards Network X-ities From a Topological Point of View: Evolvability and Scalability. Proc. 42nd Allerton Conference., <https://www.cs.unm.edu/~karlinif/papers/allerton.pdf>, (2004).
- [44] Sybex, *Networking Complete 3rd Edition*, 2002.
- [45] S. Menon, S. Gupton, Recent advances in branching mechanisms underlying neuronal morphogenesis, *F1000Res*, 7 (2018).
- [46] A. Kondo, K.H. Kaestner, Emerging diverse roles of telocytes, *Development*, 146 (2019).
- [47] E.E. Verheijck, M.J. van Kempen, M. Veereschild, J. Lurvink, H.J. Jongsma, L.N. Bouman, Electrophysiological features of the mouse sinoatrial node in relation to connexin distribution, *Cardiovascular research*, 52 (2001) 40-50.
- [48] M.R. Boyett, H. Honjo, M. Yamamoto, M.R. Nikmaram, R. Niwa, I. Kodama, Downward gradient in action potential duration along conduction path in and around the sinoatrial node, *The American journal of physiology*, 276 (1999) H686-698.
- [49] M. Michalikova, M.W.H. Remme, D. Schmitz, S. Schreiber, R. Kempter, Spikelets in pyramidal neurons: generating mechanisms, distinguishing properties, and functional implications, *Rev Neurosci*, 31 (2019) 101-119.
- [50] I. Nitsan, S. Drori, Y.E. Lewis, S. Cohen, S. Tzliil, Mechanical communication in cardiac cell synchronized beating, *NATURE PHYSICS*, 12 (2016) 472-477.
- [51] J. Lin, J.P. Keener, Ephaptic coupling in cardiac myocytes, *IEEE Trans Biomed Eng*, 60 (2013) 576-582.
- [52] G. Albrecht-Buehler, A long-range attraction between aggregating 3T3 cells mediated by near-infrared light scattering, *Proceedings of the National Academy of Sciences of the United States of America*, 102 (2005) 5050-5055.
- [53] G. Albrecht-Buehler, Rudimentary form of cellular "vision", *Proceedings of the National Academy of Sciences of the United States of America*, 89 (1992) 8288-8292.
- [54] F. Facchin, S. Canaider, R. Tassinari, C. Zannini, E. Bianconi, V. Taglioli, E. Olivi, C. Cavallini, M. Tausel, C. Ventura, Physical energies to the rescue of damaged tissues, *World J Stem Cells*, 11 (2019) 297-321.
- [55] A. Ayer, A. Zarjou, A. Agarwal, R. Stocker, Heme Oxygenases in Cardiovascular Health and Disease, *Physiological reviews*, 96 (2016) 1449-1508.
- [56] V. Di Marzo, N. Stella, A. Zimmer, Endocannabinoid signalling and the deteriorating brain, *Nat Rev Neurosci*, 16 (2015) 30-42.
- [57] R.V. Oren, C.E. Clancy, Determinants of heterogeneity, excitation and conduction in the sinoatrial node: a model study, *PLoS computational biology*, 6 (2010) e1001041.

## Supporting Information captions

**Movie 1:** A low-magnification panorama of a SAN preparation from superior vena cava, SVC (aperture on the left side) to the inferior vena cava, IVC (the aperture on the right side). The distance from the SVC to IVC is about 2.5 mm. The crista terminalis is at the bottom of the videoframe. The inter-atrial septum is not visualized in the movie but is located near the top of the videoframe. Bright flashes are action potential-induced  $\text{Ca}^{2+}$  transients. As determined by phase analysis, the first APCTs occur at the red area at 2 ms in text Fig 4C.

**Movie 2:** A network of cells within the SAN panorama in Movie 1 viewed at higher magnification. The length of the area captured in the videoframe is about 900  $\mu\text{m}$ . Bright rhythmical flashes are action potential-induced  $\text{Ca}^{2+}$  transients that inform on the occurrences of action potentials. In addition to the bright flashes, a variety of local  $\text{Ca}^{2+}$  signals that are heterogeneous in frequency, amplitude and phase are observed (text Figure 6B, red ROIs in text Fig 6C).

**Movie 3:** Diastolic local  $\text{Ca}^{2+}$  releases occur prior to the action potential-induced  $\text{Ca}^{2+}$  transients in the same cell over several cycles in (see text Figure 7 panel D). The length of the SAN cell in which the  $\text{Ca}^{2+}$  signals were recorded at the bottom of videoframe is about 60  $\mu\text{m}$ . Local  $\text{Ca}^{2+}$  releases and action potential induced  $\text{Ca}^{2+}$  transients observed in the video were recorded within the red ROIs depicted in the text Fig 7D.

**Movie 4:** A novel type of  $\text{Ca}^{2+}$  signaling in which some cells operating within a cluster (c.f. text Fig 8A green ROI) do not generate action potential-induced  $\text{Ca}^{2+}$  transients, but generate only local  $\text{Ca}^{2+}$  releases (c.f. text Fig 8B yellow ROI) that preceded action potential-induced  $\text{Ca}^{2+}$  transient firing in one or several **adjacent** cells that did not manifest their own local  $\text{Ca}^{2+}$  releases (c.f. text Fig 8B red ROI and superimposed plots in text Fig 8D). The length of the SAN cell at the bottom of the videoframe is about 85  $\mu\text{m}$ .

**Movie 5:** Action potential-induced  $\text{Ca}^{2+}$  transients (APCTs) occur out of phase in two cell clusters (upper right and middle of video) recorded from the green ROI in the central SAN depicted in text Fig 9A. Note, in the cell cluster in the middle of the video the self-organization of local  $\text{Ca}^{2+}$  releases prior to APCTs in the adjacent cells within the cluster. Note also that local  $\text{Ca}^{2+}$  releases also appear within the cell that generates APCTs, but prior to APCT firing.
